# Supplementary material for: Diabetic polyneuropathy with/out neuropathic pain in Mali: A cross-sectional study in two reference diabetes treatment centers in Bamako (Mali), Western Africa
Source: PLoS One. 2020 Nov 9;15(11):e0241387. doi: 10.1371/journal.pone.0241387 (PMC7652324; doi:10.1371/journal.pone.0241387)
Supplement: S1 Data — (XLSX) [file pone.0241387.s001.xlsx]

## Sheet: BDD
Id	Study_site	DPN	Age_range	Gender	Socio_prof	Residence	Education	Income_SMIG	Evol_diabetes	BMI	BP	HbA1C	Tcholesterol	HDL	LDL	Triglycerides	Intens_pain	Type_pain	Foot_exam	Asso_factors	Neuro_treat	Type_treat	Type_treat2	Thera_observ	Mobility	Autonomy	Usual_activi	Pain_discomf	Anxiety_Dep
1	GT-UHC	No	16-30	Male	Housewive	Bamako	Illiterate	No fixed salary or self-employed	< 1 year	<30	Low or optimal	Optimal	Low or optimal	Low or optimal	Low or optimal	Low or optimal	Low	Burning sensation	Normal (clean without a skin lesion)	Obesity	No treatment	Conventional medicine (CM)	Conventional medicine (CM)	Never a therapeutic interruption	No problem	No problem	No problems	Absence of pain/discomfort	Neither anxious nor depressed
2	GT-UHC	Yes	31-60	Female	Government empl/retired	Bamako	Arabic / Local language	No fixed salary or self-employed	5-10 years	≥30	High	Within normal limits or high	High	Low or optimal	High	Low or optimal	Intense	Tingling	Abnormal (dirty with visible skin lesions)	Tobacco	No treatment	CM and Phytotherapy	Associated medicine	Interrupted for financial reasons	Some problems	Problems with autonomy	Problems	Moderate pain/discomfort	Neither anxious nor depressed
3	CCD	Yes	>60	Female	Blue collar job/merchants	Bamako	Primary or secondary	Salary above the SMIG	5-10 years	≥30	High	Within normal limits or high	High	High	High	High	Very intense	Searing pain	Abnormal (dirty with visible skin lesions)	Obesity + Dyslipidemia	No treatment	CM and Phytotherapy	Associated medicine	Interrupted for financial reasons	Some problems	Problems with autonomy	Incapable	Extreme pain/discomfort	Moderately anxious or depressed
4	GT-UHC	Yes	16-30	Male	Housewive	Bamako	Illiterate	No fixed salary or self-employed	< 1 year	<30	Low or optimal	Optimal	Low or optimal	Low or optimal	Low or optimal	Low or optimal	Low	Burning sensation	Normal (clean without a skin lesion)	Obesity	No treatment	Conventional medicine (CM)	Conventional medicine (CM)	Never a therapeutic interruption	No problem	No problem	No problems	Absence of pain/discomfort	Neither anxious nor depressed
5	CCD	No	16-30	Female	Government empl/retired	Bamako	Arabic / Local language	Salary above the SMIG	1-5 years	<30	Low or optimal	Optimal	High	High	Low or optimal	Low or optimal	Moderate	Paresthesia	Normal (clean without a skin lesion)	AHT	No treatment	CM and Phytotherapy	Associated medicine	Interrupted for financial reasons	No problem	No problem	No problems	Absence of pain/discomfort	Moderately anxious or depressed
6	CCD	Yes	31-60	Female	Government empl/retired	Bamako	Primary or secondary	No fixed salary or self-employed	5-10 years	≥30	High	Within normal limits or high	High	High	High	High	Very intense	Paresthesia	Abnormal (dirty with visible skin lesions)	Obesity + Dyslipidemia	No treatment	CM and Phytotherapy	Associated medicine	Interrupted for financial reasons	Some problems	Problems with autonomy	Problems	Extreme pain/discomfort	Moderately anxious or depressed
7	CCD	Yes	31-60	Female	Government empl/retired	Bamako	Primary or secondary	Salary below the SMIG	5-10 years	≥30	High	Within normal limits or high	High	High	High	High	Very intense	Paresthesia	Abnormal (dirty with visible skin lesions)	Obesity + Dyslipidemia	No treatment	CM and Phytotherapy	Associated medicine	Interrupted for financial reasons	Some problems	Problems with autonomy	Problems	Extreme pain/discomfort	Moderately anxious or depressed
8	GT-UHC	No	16-30	Male	Housewive	Bamako	Illiterate	No fixed salary or self-employed	< 1 year	<30	Low or optimal	Optimal	Low or optimal	Low or optimal	Low or optimal	Low or optimal	Low	Burning sensation	Normal (clean without a skin lesion)	Obesity	No treatment	Conventional medicine (CM)	Conventional medicine (CM)	Never a therapeutic interruption	No problem	No problem	No problems	Absence of pain/discomfort	Neither anxious nor depressed
9	GT-UHC	Yes	31-60	Female	Government empl/retired	Bamako	Arabic / Local language	No fixed salary or self-employed	5-10 years	≥30	High	Within normal limits or high	High	Low or optimal	High	Low or optimal	Intense	Tingling	Abnormal (dirty with visible skin lesions)	Dyslipidemia	No treatment	CM and Phytotherapy	Associated medicine	Interrupted for financial reasons	Some problems	Problems with autonomy	Problems	Moderate pain/discomfort	Neither anxious nor depressed
10	GT-UHC	Yes	31-60	Male	Housewive	Bamako	Illiterate	No fixed salary or self-employed	1-5 years	<30	Low or optimal	Optimal	Low or optimal	Low or optimal	Low or optimal	Low or optimal	Low	Burning sensation	Normal (clean without a skin lesion)	Obesity	No treatment	Conventional medicine (CM)	Conventional medicine (CM)	Never a therapeutic interruption	No problem	No problem	No problems	Absence of pain/discomfort	Neither anxious nor depressed
11	CCD	Yes	>60	Female	Government empl/retired	Bamako	Primary or secondary	Salary below the SMIG	5-10 years	≥30	High	Within normal limits or high	High	High	High	High	Very intense	Paresthesia	Abnormal (dirty with visible skin lesions)	Obesity + Dyslipidemia	No treatment	CM and Phytotherapy	Associated medicine	Interrupted for financial reasons	Some problems	Problems with autonomy	Problems	Extreme pain/discomfort	Moderately anxious or depressed
12	CCD	No	31-60	Female	Blue collar job/merchants	Outside of Bamako	Tertiary	Salary above the SMIG	>10 years	≥30	High	Within normal limits or high	High	High	High	High	Intense	Paresthesia	Abnormal (dirty with visible skin lesions)	Obesity + Tobacco	No treatment	CM and Marabout	Associated medicine	Interrupted for a traditional treatment	Some problems	Missing	Problems	Moderate pain/discomfort	Moderately anxious or depressed
13	CCD	Yes	>60	Female	Blue collar job/merchants	Outside of Bamako	Tertiary	Salary above the SMIG	>10 years	≥30	High	Within normal limits or high	High	High	High	High	Very intense	Numbness	Abnormal (dirty with visible skin lesions)	AHT + dyslipidemia	No treatment	CM and Scarification of the feet	Associated medicine	Interrupted for a traditional treatment	Restricted, bedridden	Incapable of grooming, getting dressed	Incapable	Extreme pain/discomfort	Extremely anxious or depressed
14	CCD	Yes	31-60	Female	Government empl/retired	Bamako	Primary or secondary	Salary below the SMIG	5-10 years	≥30	High	Within normal limits or high	High	High	High	High	Very intense	Paresthesia	Abnormal (dirty with visible skin lesions)	Obesity + Dyslipidemia	No treatment	CM and Phytotherapy	Associated medicine	Interrupted for financial reasons	Some problems	Problems with autonomy	Problems	Extreme pain/discomfort	Moderately anxious or depressed
15	GT-UHC	No	16-30	Male	Housewive	Bamako	Illiterate	Salary below the SMIG	< 1 year	<30	Low or optimal	Optimal	Low or optimal	Low or optimal	Low or optimal	Low or optimal	Low	Burning sensation	Normal (clean without a skin lesion)	Obesity	No treatment	Conventional medicine (CM)	Conventional medicine (CM)	Never a therapeutic interruption	No problem	No problem	No problems	Absence of pain/discomfort	Neither anxious nor depressed
16	CCD	No	31-60	Female	Government empl/retired	Bamako	Arabic / Local language	Salary above the SMIG	1-5 years	<30	High	Within normal limits or high	High	High	High	High	Moderate	Paresthesia	Normal (clean without a skin lesion)	Dyslipidemia	No treatment	CM and Phytotherapy	Associated medicine	Interrupted for financial reasons	No problem	No problem	Problems	Moderate pain/discomfort	Moderately anxious or depressed
17	CCD	Yes	>60	Female	Blue collar job/merchants	Outside of Bamako	Primary or secondary	Salary above the SMIG	>10 years	≥30	High	Within normal limits or high	High	High	High	High	Very intense	Numbness	Abnormal (dirty with visible skin lesions)	AHT + dyslipidemia	No treatment	CM and Marabout	Associated medicine	Interrupted due to unavailability	Restricted, bedridden	Incapable of grooming, getting dressed	Incapable	Extreme pain/discomfort	Extremely anxious or depressed
18	GT-UHC	Yes	31-60	Female	Housewive	Bamako	Arabic / Local language	No fixed salary or self-employed	1-5 years	<30	Low or optimal	Within normal limits or high	Low or optimal	Low or optimal	Low or optimal	Low or optimal	Intense	Tingling	Normal (clean without a skin lesion)	Dyslipidemia	No treatment	CM and Phytotherapy	Associated medicine	Never a therapeutic interruption	Some problems	Problems with autonomy	Problems	Moderate pain/discomfort	Neither anxious nor depressed
19	GT-UHC	Yes	31-60	Male	Housewive	Bamako	Illiterate	No fixed salary or self-employed	1-5 years	<30	Low or optimal	Optimal	Low or optimal	Low or optimal	Low or optimal	Low or optimal	Low	Burning sensation	Normal (clean without a skin lesion)	Obesity	No treatment	Conventional medicine (CM)	Conventional medicine (CM)	Never a therapeutic interruption	No problem	No problem	No problems	Absence of pain/discomfort	Neither anxious nor depressed
20	CCD	No	31-60	Female	Government empl/retired	Bamako	Arabic / Local language	Salary above the SMIG	1-5 years	<30	High	Within normal limits or high	High	High	Low or optimal	High	Moderate	Paresthesia	Normal (clean without a skin lesion)	Dyslipidemia	No treatment	CM and Phytotherapy	Associated medicine	Interrupted for financial reasons	No problem	No problem	No problems	Moderate pain/discomfort	Moderately anxious or depressed
21	CCD	Yes	>60	Female	Blue collar job/merchants	Outside of Bamako	Primary or secondary	Salary above the SMIG	>10 years	≥30	High	Within normal limits or high	High	High	High	High	Very intense	Numbness	Abnormal (dirty with visible skin lesions)	AHT + dyslipidemia	No treatment	CM and Marabout	Associated medicine	Interrupted for financial reasons	Restricted, bedridden	Incapable of grooming, getting dressed	Incapable	Extreme pain/discomfort	Extremely anxious or depressed
22	GT-UHC	Yes	31-60	Male	Housewive	Bamako	Illiterate	No fixed salary or self-employed	1-5 years	<30	Low or optimal	Optimal	Low or optimal	Low or optimal	Low or optimal	Low or optimal	Moderate	Burning sensation	Normal (clean without a skin lesion)	Obesity	No treatment	Conventional medicine (CM)	Conventional medicine (CM)	Never a therapeutic interruption	No problem	No problem	No problems	Absence of pain/discomfort	Neither anxious nor depressed
23	GT-UHC	Yes	16-30	Male	Housewive	Bamako	Illiterate	No fixed salary or self-employed	< 1 year	<30	Low or optimal	Optimal	Low or optimal	Low or optimal	Low or optimal	Low or optimal	Low	Burning sensation	Normal (clean without a skin lesion)	Obesity	No treatment	Conventional medicine (CM)	Conventional medicine (CM)	Never a therapeutic interruption	No problem	No problem	No problems	Absence of pain/discomfort	Neither anxious nor depressed
24	GT-UHC	Yes	31-60	Male	Housewive	Bamako	Illiterate	No fixed salary or self-employed	1-5 years	<30	Low or optimal	Optimal	Low or optimal	Low or optimal	Low or optimal	Low or optimal	Moderate	Burning sensation	Normal (clean without a skin lesion)	Obesity	No treatment	Conventional medicine (CM)	Conventional medicine (CM)	Never a therapeutic interruption	No problem	No problem	No problems	Absence of pain/discomfort	Neither anxious nor depressed
25	CCD	No	16-30	Female	Housewive	Bamako	Illiterate	Salary below the SMIG	< 1 year	<30	Low or optimal	Optimal	Low or optimal	High	Low or optimal	Low or optimal	Low	Paresthesia	Normal (clean without a skin lesion)	AHT	No treatment	CM and Phytotherapy	Associated medicine	Never a therapeutic interruption	No problem	No problem	No problems	Absence of pain/discomfort	Neither anxious nor depressed
26	CCD	Yes	>60	Female	Blue collar job/merchants	Bamako	Primary or secondary	Salary below the SMIG	5-10 years	≥30	High	Within normal limits or high	High	High	High	High	Very intense	Paresthesia	Abnormal (dirty with visible skin lesions)	Obesity + Dyslipidemia	No treatment	CM and Phytotherapy	Associated medicine	Interrupted for financial reasons	Some problems	Problems with autonomy	Problems	Extreme pain/discomfort	Moderately anxious or depressed
27	CCD	Yes	>60	Female	Blue collar job/merchants	Bamako	Primary or secondary	Salary above the SMIG	5-10 years	≥30	High	Within normal limits or high	High	High	High	High	Very intense	Searing pain	Abnormal (dirty with visible skin lesions)	Obesity + Dyslipidemia	No treatment	CM and Phytotherapy	Associated medicine	Interrupted for financial reasons	Some problems	Problems with autonomy	Incapable	Extreme pain/discomfort	Moderately anxious or depressed
28	CCD	Yes	>60	Female	Blue collar job/merchants	Outside of Bamako	Primary or secondary	Salary above the SMIG	5-10 years	≥30	High	Within normal limits or high	High	High	High	High	Very intense	Searing pain	Abnormal (dirty with visible skin lesions)	Obesity + Dyslipidemia	No treatment	CM and Marabout	Associated medicine	Interrupted for financial reasons	Restricted, bedridden	Incapable of grooming, getting dressed	Incapable	Extreme pain/discomfort	Extremely anxious or depressed
29	CCD	Yes	>60	Female	Others	Outside of Bamako	Tertiary	Salary above the SMIG	>10 years	≥30	High	Within normal limits or high	High	High	High	High	Very intense	Numbness	Abnormal (dirty with visible skin lesions)	Obesity + AHT+ Dyslipidemia + Tobacco	No treatment	CM and Scarification of the feet	Associated medicine	Interrupted for a traditional treatment	Restricted, bedridden	Incapable of grooming, getting dressed	Incapable	Extreme pain/discomfort	Extremely anxious or depressed
30	CCD	Yes	>60	Female	Blue collar job/merchants	Outside of Bamako	Tertiary	Salary above the SMIG	>10 years	≥30	High	Within normal limits or high	High	High	High	High	Very intense	Numbness	Abnormal (dirty with visible skin lesions)	AHT + dyslipidemia	No treatment	CM and Scarification of the feet	Associated medicine	Interrupted for a traditional treatment	Restricted, bedridden	Incapable of grooming, getting dressed	Incapable	Extreme pain/discomfort	Extremely anxious or depressed
31	GT-UHC	Yes	31-60	Female	Government empl/retired	Bamako	Arabic / Local language	No fixed salary or self-employed	5-10 years	≥30	High	Within normal limits or high	High	Low or optimal	High	Low or optimal	Intense	Tingling	Abnormal (dirty with visible skin lesions)	Dyslipidemia	No treatment	CM and Phytotherapy	Associated medicine	Interrupted for financial reasons	Some problems	Problems with autonomy	Problems	Moderate pain/discomfort	Neither anxious nor depressed
32	GT-UHC	Yes	31-60	Female	Government empl/retired	Bamako	Arabic / Local language	No fixed salary or self-employed	5-10 years	≥30	High	Within normal limits or high	High	Low or optimal	High	Low or optimal	Intense	Tingling	Abnormal (dirty with visible skin lesions)	Obesity + AHT	No treatment	CM and Phytotherapy	Associated medicine	Interrupted for financial reasons	Some problems	Problems with autonomy	Problems	Moderate pain/discomfort	Neither anxious nor depressed
33	GT-UHC	No	16-30	Male	Housewive	Bamako	Illiterate	Salary below the SMIG	< 1 year	<30	Low or optimal	Optimal	Low or optimal	Low or optimal	Low or optimal	Low or optimal	Low	Burning sensation	Normal (clean without a skin lesion)	Obesity	No treatment	Conventional medicine (CM)	Conventional medicine (CM)	Never a therapeutic interruption	No problem	No problem	No problems	Absence of pain/discomfort	Neither anxious nor depressed
34	GT-UHC	Yes	31-60	Female	Government empl/retired	Bamako	Arabic / Local language	No fixed salary or self-employed	5-10 years	≥30	Low or optimal	Within normal limits or high	Low or optimal	Low or optimal	High	Low or optimal	Intense	Tingling	Abnormal (dirty with visible skin lesions)	Dyslipidemia	No treatment	CM and Phytotherapy	Associated medicine	Interrupted for financial reasons	Some problems	Problems with autonomy	Problems	Moderate pain/discomfort	Neither anxious nor depressed
35	GT-UHC	No	16-30	Male	Housewive	Bamako	Illiterate	Salary below the SMIG	< 1 year	<30	Low or optimal	Optimal	Low or optimal	Low or optimal	Low or optimal	Low or optimal	Low	Burning sensation	Normal (clean without a skin lesion)	Obesity	No treatment	Conventional medicine (CM)	Conventional medicine (CM)	Never a therapeutic interruption	No problem	No problem	No problems	Absence of pain/discomfort	Neither anxious nor depressed
36	GT-UHC	Yes	31-60	Female	Government empl/retired	Bamako	Arabic / Local language	No fixed salary or self-employed	5-10 years	≥30	Low or optimal	Within normal limits or high	Low or optimal	Low or optimal	High	Low or optimal	Intense	Tingling	Abnormal (dirty with visible skin lesions)	Dyslipidemia	No treatment	CM and Phytotherapy	Associated medicine	Never a therapeutic interruption	Some problems	Problems with autonomy	Problems	Moderate pain/discomfort	Neither anxious nor depressed
37	CCD	No	16-30	Female	Government empl/retired	Bamako	Arabic / Local language	Salary above the SMIG	1-5 years	<30	Low or optimal	Optimal	High	High	Low or optimal	Low or optimal	Moderate	Paresthesia	Normal (clean without a skin lesion)	AHT	No treatment	CM and Phytotherapy	Associated medicine	Interrupted for financial reasons	No problem	No problem	No problems	Absence of pain/discomfort	Moderately anxious or depressed
38	GT-UHC	Yes	31-60	Female	Government empl/retired	Bamako	Arabic / Local language	No fixed salary or self-employed	5-10 years	≥30	Low or optimal	Within normal limits or high	Low or optimal	Low or optimal	High	Low or optimal	Intense	Tingling	Abnormal (dirty with visible skin lesions)	Dyslipidemia	No treatment	CM and Phytotherapy	Associated medicine	Never a therapeutic interruption	Some problems	Problems with autonomy	Problems	Moderate pain/discomfort	Neither anxious nor depressed
39	GT-UHC	Yes	31-60	Female	Government empl/retired	Bamako	Arabic / Local language	No fixed salary or self-employed	5-10 years	≥30	High	Within normal limits or high	High	Low or optimal	High	Low or optimal	Intense	Tingling	Abnormal (dirty with visible skin lesions)	Obesity + AHT	No treatment	CM and Phytotherapy	Associated medicine	Interrupted for financial reasons	Some problems	Problems with autonomy	Problems	Moderate pain/discomfort	Neither anxious nor depressed
40	CCD	No	16-30	Female	Government empl/retired	Bamako	Illiterate	Salary above the SMIG	1-5 years	<30	Low or optimal	Optimal	High	High	Low or optimal	Low or optimal	Low	Paresthesia	Normal (clean without a skin lesion)	AHT	No treatment	CM and Phytotherapy	Associated medicine	Never a therapeutic interruption	No problem	No problem	No problems	Absence of pain/discomfort	Moderately anxious or depressed
41	CCD	No	31-60	Female	Blue collar job/merchants	Outside of Bamako	Tertiary	Salary above the SMIG	5-10 years	≥30	High	Within normal limits or high	High	High	High	High	Intense	Paresthesia	Abnormal (dirty with visible skin lesions)	Obesity + Dyslipidemia	No treatment	CM and Marabout	Associated medicine	Interrupted for a traditional treatment	Some problems	Missing	Problems	Moderate pain/discomfort	Moderately anxious or depressed
42	GT-UHC	Yes	16-30	Male	Housewive	Bamako	Illiterate	No fixed salary or self-employed	< 1 year	<30	Low or optimal	Optimal	Low or optimal	Low or optimal	Low or optimal	Low or optimal	Low	Burning sensation	Normal (clean without a skin lesion)	Obesity	No treatment	Conventional medicine (CM)	Conventional medicine (CM)	Never a therapeutic interruption	No problem	No problem	No problems	Absence of pain/discomfort	Neither anxious nor depressed
43	GT-UHC	Yes	31-60	Female	Government empl/retired	Bamako	Arabic / Local language	No fixed salary or self-employed	5-10 years	≥30	Low or optimal	Within normal limits or high	Low or optimal	Low or optimal	High	Low or optimal	Intense	Tingling	Abnormal (dirty with visible skin lesions)	Dyslipidemia	No treatment	CM and Phytotherapy	Associated medicine	Interrupted for financial reasons	Some problems	Problems with autonomy	Problems	Moderate pain/discomfort	Neither anxious nor depressed
44	CCD	Yes	>60	Female	Blue collar job/merchants	Bamako	Primary or secondary	Salary below the SMIG	5-10 years	≥30	High	Within normal limits or high	High	High	High	High	Very intense	Paresthesia	Abnormal (dirty with visible skin lesions)	Obesity + Dyslipidemia	No treatment	CM and Phytotherapy	Associated medicine	Interrupted for financial reasons	Some problems	Problems with autonomy	Problems	Extreme pain/discomfort	Moderately anxious or depressed
45	CCD	Yes	>60	Female	Blue collar job/merchants	Bamako	Primary or secondary	Salary below the SMIG	5-10 years	≥30	High	Within normal limits or high	High	High	High	High	Very intense	Paresthesia	Abnormal (dirty with visible skin lesions)	Obesity + Dyslipidemia	No treatment	CM and Phytotherapy	Associated medicine	Interrupted for financial reasons	Some problems	Problems with autonomy	Incapable	Extreme pain/discomfort	Moderately anxious or depressed
46	GT-UHC	Yes	31-60	Male	Housewive	Bamako	Illiterate	No fixed salary or self-employed	< 1 year	<30	Low or optimal	Optimal	Low or optimal	Low or optimal	Low or optimal	Low or optimal	Low	Burning sensation	Normal (clean without a skin lesion)	Obesity	No treatment	Conventional medicine (CM)	Conventional medicine (CM)	Never a therapeutic interruption	No problem	No problem	No problems	Absence of pain/discomfort	Neither anxious nor depressed
47	GT-UHC	Yes	31-60	Female	Government empl/retired	Bamako	Arabic / Local language	No fixed salary or self-employed	5-10 years	≥30	High	Within normal limits or high	High	Low or optimal	High	High	Intense	Tingling	Abnormal (dirty with visible skin lesions)	Obesity + Dyslipidemia	No treatment	CM and Phytotherapy	Associated medicine	Interrupted for financial reasons	Some problems	Problems with autonomy	Problems	Moderate pain/discomfort	Neither anxious nor depressed
48	GT-UHC	Yes	31-60	Female	Government empl/retired	Bamako	Arabic / Local language	No fixed salary or self-employed	5-10 years	≥30	High	Within normal limits or high	High	Low or optimal	High	Low or optimal	Intense	Tingling	Abnormal (dirty with visible skin lesions)	Obesity + AHT	No treatment	CM and Phytotherapy	Associated medicine	Interrupted for financial reasons	Some problems	Problems with autonomy	Problems	Moderate pain/discomfort	Neither anxious nor depressed
49	GT-UHC	Yes	31-60	Female	Government empl/retired	Bamako	Arabic / Local language	No fixed salary or self-employed	5-10 years	≥30	Low or optimal	Within normal limits or high	High	Low or optimal	High	Low or optimal	Intense	Tingling	Abnormal (dirty with visible skin lesions)	Dyslipidemia	No treatment	CM and Phytotherapy	Associated medicine	Interrupted for financial reasons	Some problems	Problems with autonomy	Problems	Moderate pain/discomfort	Neither anxious nor depressed
50	CCD	Yes	>60	Female	Blue collar job/merchants	Outside of Bamako	Primary or secondary	Salary above the SMIG	>10 years	≥30	High	Within normal limits or high	High	High	High	High	Very intense	Numbness	Abnormal (dirty with visible skin lesions)	AHT + dyslipidemia	No treatment	CM and Marabout	Associated medicine	Interrupted due to unavailability	Restricted, bedridden	Incapable of grooming, getting dressed	Incapable	Extreme pain/discomfort	Extremely anxious or depressed
51	GT-UHC	Yes	31-60	Female	Government empl/retired	Bamako	Arabic / Local language	No fixed salary or self-employed	5-10 years	≥30	High	Within normal limits or high	High	Low or optimal	High	Low or optimal	Intense	Tingling	Abnormal (dirty with visible skin lesions)	Obesity + AHT	No treatment	CM and Phytotherapy	Associated medicine	Interrupted for financial reasons	Some problems	Problems with autonomy	Problems	Moderate pain/discomfort	Neither anxious nor depressed
52	CCD	Yes	31-60	Female	Government empl/retired	Bamako	Primary or secondary	No fixed salary or self-employed	5-10 years	≥30	High	Within normal limits or high	High	High	High	High	Intense	Paresthesia	Abnormal (dirty with visible skin lesions)	Obesity + Dyslipidemia	No treatment	CM and Phytotherapy	Associated medicine	Interrupted for financial reasons	Some problems	Problems with autonomy	Problems	Extreme pain/discomfort	Moderately anxious or depressed
53	GT-UHC	No	16-30	Male	Housewive	Bamako	Illiterate	Salary below the SMIG	< 1 year	<30	Low or optimal	Optimal	Low or optimal	Low or optimal	Low or optimal	Low or optimal	Low	Burning sensation	Normal (clean without a skin lesion)	Obesity	No treatment	Conventional medicine (CM)	Conventional medicine (CM)	Never a therapeutic interruption	No problem	No problem	No problems	Absence of pain/discomfort	Neither anxious nor depressed
54	GT-UHC	No	16-30	Male	Housewive	Bamako	Illiterate	Salary below the SMIG	< 1 year	<30	Low or optimal	Optimal	Low or optimal	High	Low or optimal	Low or optimal	Low	Paresthesia	Normal (clean without a skin lesion)	AHT	No treatment	CM and Phytotherapy	Associated medicine	Never a therapeutic interruption	No problem	No problem	No problems	Absence of pain/discomfort	Neither anxious nor depressed
55	GT-UHC	No	16-30	Male	Housewive	Bamako	Illiterate	Salary below the SMIG	< 1 year	<30	Low or optimal	Optimal	Low or optimal	Low or optimal	Low or optimal	Low or optimal	Low	Burning sensation	Normal (clean without a skin lesion)	Obesity	No treatment	Conventional medicine (CM)	Conventional medicine (CM)	Never a therapeutic interruption	No problem	No problem	No problems	Absence of pain/discomfort	Neither anxious nor depressed
56	GT-UHC	Yes	31-60	Female	Housewive	Bamako	Illiterate	No fixed salary or self-employed	1-5 years	<30	Low or optimal	Within normal limits or high	Low or optimal	Low or optimal	Low or optimal	Low or optimal	Moderate	Burning sensation	Normal (clean without a skin lesion)	Obesity	No treatment	CM and Phytotherapy	Associated medicine	Never a therapeutic interruption	No problem	No problem	Problems	Moderate pain/discomfort	Neither anxious nor depressed
57	GT-UHC	Yes	31-60	Female	Housewive	Bamako	Illiterate	No fixed salary or self-employed	1-5 years	<30	Low or optimal	Within normal limits or high	Low or optimal	Low or optimal	Low or optimal	Low or optimal	Intense	Burning sensation	Normal (clean without a skin lesion)	Dyslipidemia	No treatment	CM and Phytotherapy	Associated medicine	Never a therapeutic interruption	Some problems	Problems with autonomy	Problems	Moderate pain/discomfort	Neither anxious nor depressed
58	CCD	Yes	31-60	Female	Government empl/retired	Bamako	Primary or secondary	No fixed salary or self-employed	5-10 years	≥30	High	Within normal limits or high	High	High	High	High	Intense	Paresthesia	Abnormal (dirty with visible skin lesions)	Obesity + Dyslipidemia	No treatment	CM and Phytotherapy	Associated medicine	Interrupted for financial reasons	Some problems	Problems with autonomy	Problems	Moderate pain/discomfort	Neither anxious nor depressed
59	GT-UHC	Yes	31-60	Female	Housewive	Bamako	Illiterate	No fixed salary or self-employed	1-5 years	<30	Low or optimal	Within normal limits or high	Low or optimal	Low or optimal	Low or optimal	Low or optimal	Intense	Tingling	Normal (clean without a skin lesion)	Dyslipidemia	No treatment	CM and Phytotherapy	Associated medicine	Never a therapeutic interruption	Some problems	Problems with autonomy	Problems	Moderate pain/discomfort	Neither anxious nor depressed
60	GT-UHC	Yes	31-60	Female	Government empl/retired	Bamako	Arabic / Local language	No fixed salary or self-employed	5-10 years	≥30	High	Within normal limits or high	High	Low or optimal	High	High	Intense	Tingling	Abnormal (dirty with visible skin lesions)	Obesity + Dyslipidemia	No treatment	CM and Phytotherapy	Associated medicine	Interrupted for financial reasons	Some problems	Problems with autonomy	Problems	Moderate pain/discomfort	Neither anxious nor depressed
61	CCD	Yes	31-60	Female	Government empl/retired	Bamako	Primary or secondary	Salary below the SMIG	5-10 years	≥30	High	Within normal limits or high	High	High	High	High	Very intense	Paresthesia	Abnormal (dirty with visible skin lesions)	Obesity + Dyslipidemia	No treatment	CM and Phytotherapy	Associated medicine	Interrupted for financial reasons	Some problems	Problems with autonomy	Problems	Extreme pain/discomfort	Moderately anxious or depressed
62	GT-UHC	Yes	31-60	Female	Government empl/retired	Bamako	Arabic / Local language	No fixed salary or self-employed	5-10 years	≥30	High	Within normal limits or high	High	Low or optimal	High	Low or optimal	Intense	Tingling	Abnormal (dirty with visible skin lesions)	Obesity + AHT	No treatment	CM and Phytotherapy	Associated medicine	Interrupted for financial reasons	Some problems	Problems with autonomy	Problems	Moderate pain/discomfort	Neither anxious nor depressed
63	CCD	Yes	>60	Female	Blue collar job/merchants	Bamako	Primary or secondary	Salary below the SMIG	5-10 years	≥30	High	Within normal limits or high	High	High	High	High	Very intense	Searing pain	Abnormal (dirty with visible skin lesions)	Obesity + Dyslipidemia	No treatment	CM and Phytotherapy	Associated medicine	Interrupted for financial reasons	Some problems	Problems with autonomy	Incapable	Extreme pain/discomfort	Moderately anxious or depressed
64	GT-UHC	Yes	31-60	Female	Government empl/retired	Bamako	Arabic / Local language	No fixed salary or self-employed	5-10 years	≥30	High	Within normal limits or high	High	Low or optimal	High	High	Intense	Tingling	Abnormal (dirty with visible skin lesions)	Obesity + Dyslipidemia	No treatment	CM and Phytotherapy	Associated medicine	Interrupted for financial reasons	Some problems	Problems with autonomy	Problems	Moderate pain/discomfort	Neither anxious nor depressed
65	CCD	No	31-60	Female	Government empl/retired	Bamako	Arabic / Local language	Salary above the SMIG	1-5 years	<30	Low or optimal	Within normal limits or high	High	High	Low or optimal	Low or optimal	Moderate	Paresthesia	Normal (clean without a skin lesion)	Dyslipidemia	No treatment	CM and Phytotherapy	Associated medicine	Interrupted for financial reasons	No problem	No problem	No problems	Moderate pain/discomfort	Moderately anxious or depressed
66	GT-UHC	No	16-30	Male	Housewive	Bamako	Illiterate	No fixed salary or self-employed	< 1 year	<30	Low or optimal	Optimal	Low or optimal	Low or optimal	Low or optimal	Low or optimal	Low	Burning sensation	Normal (clean without a skin lesion)	Obesity	No treatment	Conventional medicine (CM)	Conventional medicine (CM)	Never a therapeutic interruption	No problem	No problem	No problems	Absence of pain/discomfort	Neither anxious nor depressed
67	CCD	Yes	31-60	Female	Government empl/retired	Bamako	Primary or secondary	No fixed salary or self-employed	5-10 years	≥30	High	Within normal limits or high	High	High	High	High	Intense	Paresthesia	Abnormal (dirty with visible skin lesions)	Obesity + Dyslipidemia	No treatment	CM and Phytotherapy	Associated medicine	Interrupted for financial reasons	Some problems	Problems with autonomy	Problems	Moderate pain/discomfort	Moderately anxious or depressed
68	GT-UHC	Yes	31-60	Male	Housewive	Bamako	Illiterate	No fixed salary or self-employed	1-5 years	<30	Low or optimal	Optimal	Low or optimal	Low or optimal	Low or optimal	Low or optimal	Moderate	Burning sensation	Normal (clean without a skin lesion)	Obesity	No treatment	CM and Phytotherapy	Associated medicine	Never a therapeutic interruption	No problem	No problem	Problems	Absence of pain/discomfort	Neither anxious nor depressed
69	GT-UHC	Yes	31-60	Male	Housewive	Bamako	Illiterate	No fixed salary or self-employed	< 1 year	<30	Low or optimal	Optimal	Low or optimal	Low or optimal	Low or optimal	Low or optimal	Low	Burning sensation	Normal (clean without a skin lesion)	Obesity	No treatment	Conventional medicine (CM)	Conventional medicine (CM)	Never a therapeutic interruption	No problem	No problem	No problems	Absence of pain/discomfort	Neither anxious nor depressed
70	GT-UHC	Yes	31-60	Male	Housewive	Bamako	Illiterate	No fixed salary or self-employed	1-5 years	<30	Low or optimal	Optimal	Low or optimal	Low or optimal	Low or optimal	Low or optimal	Moderate	Burning sensation	Normal (clean without a skin lesion)	Obesity	No treatment	CM and Phytotherapy	Associated medicine	Never a therapeutic interruption	No problem	No problem	Problems	Absence of pain/discomfort	Neither anxious nor depressed
71	CCD	No	31-60	Female	Blue collar job/merchants	Outside of Bamako	Tertiary	Salary above the SMIG	5-10 years	≥30	High	Within normal limits or high	High	High	High	High	Intense	Paresthesia	Abnormal (dirty with visible skin lesions)	Obesity + AHT	No treatment	CM and Marabout	Associated medicine	Interrupted for a traditional treatment	Some problems	Problems with autonomy	Problems	Moderate pain/discomfort	Moderately anxious or depressed
72	CCD	No	31-60	Female	Blue collar job/merchants	Outside of Bamako	Primary or secondary	Salary above the SMIG	1-5 years	≥30	High	Within normal limits or high	High	High	High	High	Moderate	Paresthesia	Abnormal (dirty with visible skin lesions)	Tobacco	No treatment	CM and Marabout	Associated medicine	Interrupted due to unavailability	No problem	No problem	Problems	Moderate pain/discomfort	Moderately anxious or depressed
73	GT-UHC	Yes	31-60	Female	Housewive	Bamako	Illiterate	No fixed salary or self-employed	1-5 years	<30	Low or optimal	Within normal limits or high	Low or optimal	Low or optimal	Low or optimal	Low or optimal	Moderate	Burning sensation	Normal (clean without a skin lesion)	Obesity	No treatment	CM and Phytotherapy	Associated medicine	Never a therapeutic interruption	No problem	No problem	Problems	Absence of pain/discomfort	Neither anxious nor depressed
74	CCD	No	16-30	Female	Housewive	Bamako	Illiterate	Salary above the SMIG	< 1 year	<30	Low or optimal	Optimal	High	High	Low or optimal	Low or optimal	Low	Paresthesia	Normal (clean without a skin lesion)	AHT	No treatment	CM and Phytotherapy	Associated medicine	Never a therapeutic interruption	No problem	No problem	No problems	Absence of pain/discomfort	Neither anxious nor depressed
75	CCD	Yes	>60	Female	Blue collar job/merchants	Bamako	Primary or secondary	Salary below the SMIG	5-10 years	≥30	High	Within normal limits or high	High	High	High	High	Very intense	Paresthesia	Abnormal (dirty with visible skin lesions)	Obesity + Dyslipidemia	No treatment	CM and Phytotherapy	Associated medicine	Interrupted for financial reasons	Some problems	Problems with autonomy	Incapable	Extreme pain/discomfort	Moderately anxious or depressed
76	GT-UHC	Yes	31-60	Female	Housewive	Bamako	Illiterate	No fixed salary or self-employed	1-5 years	<30	Low or optimal	Within normal limits or high	Low or optimal	Low or optimal	Low or optimal	Low or optimal	Moderate	Burning sensation	Normal (clean without a skin lesion)	AHT	No treatment	CM and Phytotherapy	Associated medicine	Never a therapeutic interruption	No problem	No problem	Problems	Moderate pain/discomfort	Neither anxious nor depressed
77	GT-UHC	Yes	31-60	Male	Housewive	Bamako	Illiterate	No fixed salary or self-employed	1-5 years	<30	Low or optimal	Optimal	Low or optimal	Low or optimal	Low or optimal	Low or optimal	Moderate	Burning sensation	Normal (clean without a skin lesion)	Obesity	No treatment	CM and Phytotherapy	Associated medicine	Never a therapeutic interruption	No problem	No problem	Problems	Absence of pain/discomfort	Neither anxious nor depressed
78	CCD	Yes	>60	Female	Blue collar job/merchants	Outside of Bamako	Primary or secondary	Salary above the SMIG	>10 years	≥30	High	Within normal limits or high	High	High	High	High	Very intense	Numbness	Abnormal (dirty with visible skin lesions)	AHT + dyslipidemia	No treatment	CM and Marabout	Associated medicine	Interrupted for a traditional treatment	Restricted, bedridden	Incapable of grooming, getting dressed	Incapable	Extreme pain/discomfort	Extremely anxious or depressed
79	CCD	No	16-30	Female	Housewive	Bamako	Illiterate	Salary above the SMIG	< 1 year	<30	Low or optimal	Optimal	High	High	Low or optimal	Low or optimal	Low	Paresthesia	Normal (clean without a skin lesion)	AHT	No treatment	CM and Phytotherapy	Associated medicine	Never a therapeutic interruption	No problem	No problem	No problems	Absence of pain/discomfort	Neither anxious nor depressed
80	CCD	Yes	31-60	Female	Government empl/retired	Bamako	Primary or secondary	No fixed salary or self-employed	5-10 years	≥30	High	Within normal limits or high	High	High	High	High	Very intense	Paresthesia	Abnormal (dirty with visible skin lesions)	Obesity + Dyslipidemia	No treatment	CM and Phytotherapy	Associated medicine	Interrupted for financial reasons	Some problems	Problems with autonomy	Problems	Extreme pain/discomfort	Moderately anxious or depressed
81	CCD	Yes	>60	Female	Blue collar job/merchants	Outside of Bamako	Primary or secondary	Salary above the SMIG	>10 years	≥30	High	Within normal limits or high	High	High	High	High	Very intense	Searing pain	Abnormal (dirty with visible skin lesions)	AHT + dyslipidemia	No treatment	CM and Marabout	Associated medicine	Interrupted for financial reasons	Restricted, bedridden	Incapable of grooming, getting dressed	Incapable	Extreme pain/discomfort	Extremely anxious or depressed
82	CCD	Yes	>60	Female	Blue collar job/merchants	Bamako	Primary or secondary	Salary above the SMIG	5-10 years	≥30	High	Within normal limits or high	High	High	High	High	Very intense	Searing pain	Abnormal (dirty with visible skin lesions)	Obesity + Dyslipidemia	No treatment	CM and Phytotherapy	Associated medicine	Interrupted for financial reasons	Some problems	Problems with autonomy	Incapable	Extreme pain/discomfort	Moderately anxious or depressed
83	GT-UHC	No	16-30	Male	Housewive	Bamako	Illiterate	No fixed salary or self-employed	< 1 year	<30	Low or optimal	Optimal	Low or optimal	Low or optimal	Low or optimal	Low or optimal	Low	Burning sensation	Normal (clean without a skin lesion)	Obesity	No treatment	Conventional medicine (CM)	Conventional medicine (CM)	Never a therapeutic interruption	No problem	No problem	No problems	Absence of pain/discomfort	Neither anxious nor depressed
84	GT-UHC	Yes	31-60	Male	Housewive	Bamako	Illiterate	No fixed salary or self-employed	1-5 years	<30	Low or optimal	Within normal limits or high	Low or optimal	Low or optimal	Low or optimal	Low or optimal	Moderate	Burning sensation	Normal (clean without a skin lesion)	Obesity	No treatment	CM and Phytotherapy	Associated medicine	Never a therapeutic interruption	No problem	No problem	Problems	Absence of pain/discomfort	Neither anxious nor depressed
85	CCD	No	16-30	Female	Government empl/retired	Bamako	Arabic / Local language	Salary above the SMIG	1-5 years	<30	Low or optimal	Optimal	High	High	Low or optimal	Low or optimal	Moderate	Paresthesia	Normal (clean without a skin lesion)	AHT	No treatment	CM and Phytotherapy	Associated medicine	Never a therapeutic interruption	No problem	No problem	No problems	Absence of pain/discomfort	Moderately anxious or depressed
86	GT-UHC	No	16-30	Male	Housewive	Bamako	Illiterate	Salary below the SMIG	< 1 year	<30	Low or optimal	Optimal	Low or optimal	Low or optimal	Low or optimal	Low or optimal	Low	Burning sensation	Normal (clean without a skin lesion)	Obesity	No treatment	Conventional medicine (CM)	Conventional medicine (CM)	Never a therapeutic interruption	No problem	No problem	No problems	Absence of pain/discomfort	Neither anxious nor depressed
87	CCD	No	16-30	Female	Government empl/retired	Bamako	Arabic / Local language	Salary above the SMIG	1-5 years	<30	Low or optimal	Optimal	High	High	Low or optimal	Low or optimal	Moderate	Paresthesia	Normal (clean without a skin lesion)	Dyslipidemia	No treatment	CM and Phytotherapy	Associated medicine	Interrupted for financial reasons	No problem	No problem	No problems	Moderate pain/discomfort	Moderately anxious or depressed
88	GT-UHC	Yes	31-60	Male	Housewive	Bamako	Illiterate	No fixed salary or self-employed	1-5 years	<30	Low or optimal	Optimal	Low or optimal	Low or optimal	Low or optimal	Low or optimal	Low	Burning sensation	Normal (clean without a skin lesion)	Obesity	No treatment	Conventional medicine (CM)	Conventional medicine (CM)	Never a therapeutic interruption	No problem	No problem	No problems	Absence of pain/discomfort	Neither anxious nor depressed
89	CCD	Yes	31-60	Female	Government empl/retired	Bamako	Primary or secondary	Salary below the SMIG	5-10 years	≥30	High	Within normal limits or high	High	High	High	High	Very intense	Paresthesia	Abnormal (dirty with visible skin lesions)	Obesity + Dyslipidemia	No treatment	CM and Phytotherapy	Associated medicine	Interrupted for financial reasons	Some problems	Problems with autonomy	Problems	Extreme pain/discomfort	Moderately anxious or depressed
90	CCD	No	31-60	Female	Government empl/retired	Bamako	Arabic / Local language	Salary above the SMIG	1-5 years	<30	High	Within normal limits or high	High	High	Low or optimal	High	Moderate	Paresthesia	Normal (clean without a skin lesion)	Dyslipidemia	No treatment	CM and Phytotherapy	Associated medicine	Interrupted for financial reasons	No problem	No problem	No problems	Moderate pain/discomfort	Moderately anxious or depressed
91	GT-UHC	Yes	31-60	Male	Housewive	Bamako	Illiterate	No fixed salary or self-employed	1-5 years	<30	Low or optimal	Optimal	Low or optimal	Low or optimal	Low or optimal	Low or optimal	Moderate	Burning sensation	Normal (clean without a skin lesion)	Obesity	No treatment	CM and Phytotherapy	Associated medicine	Never a therapeutic interruption	No problem	No problem	Problems	Absence of pain/discomfort	Neither anxious nor depressed
92	CCD	Yes	31-60	Female	Government empl/retired	Bamako	Primary or secondary	No fixed salary or self-employed	5-10 years	≥30	High	Within normal limits or high	High	High	High	High	Intense	Paresthesia	Abnormal (dirty with visible skin lesions)	Obesity + Dyslipidemia	No treatment	CM and Phytotherapy	Associated medicine	Interrupted for financial reasons	Some problems	Problems with autonomy	Problems	Moderate pain/discomfort	Neither anxious nor depressed
93	CCD	No	16-30	Female	Housewive	Bamako	Illiterate	Salary below the SMIG	< 1 year	<30	Low or optimal	Optimal	Low or optimal	High	Low or optimal	Low or optimal	Low	Paresthesia	Normal (clean without a skin lesion)	AHT	No treatment	CM and Phytotherapy	Associated medicine	Never a therapeutic interruption	No problem	No problem	No problems	Absence of pain/discomfort	Neither anxious nor depressed
94	CCD	No	16-30	Female	Government empl/retired	Bamako	Arabic / Local language	Salary above the SMIG	1-5 years	<30	Low or optimal	Optimal	High	High	Low or optimal	Low or optimal	Moderate	Paresthesia	Normal (clean without a skin lesion)	AHT	No treatment	CM and Phytotherapy	Associated medicine	Interrupted for financial reasons	No problem	No problem	No problems	Moderate pain/discomfort	Moderately anxious or depressed
95	GT-UHC	No	16-30	Male	Housewive	Bamako	Illiterate	Salary below the SMIG	< 1 year	<30	Low or optimal	Optimal	Low or optimal	Low or optimal	Low or optimal	Low or optimal	Low	Tingling	Normal (clean without a skin lesion)	Obesity	No treatment	CM and Phytotherapy	Associated medicine	Never a therapeutic interruption	No problem	No problem	No problems	Absence of pain/discomfort	Neither anxious nor depressed
96	GT-UHC	No	16-30	Male	Housewive	Bamako	Illiterate	Salary below the SMIG	< 1 year	<30	Low or optimal	Optimal	Low or optimal	Low or optimal	Low or optimal	Low or optimal	Low	Paresthesia	Normal (clean without a skin lesion)	Obesity	No treatment	CM and Phytotherapy	Associated medicine	Never a therapeutic interruption	No problem	No problem	No problems	Absence of pain/discomfort	Neither anxious nor depressed
97	GT-UHC	Yes	31-60	Female	Government empl/retired	Bamako	Arabic / Local language	No fixed salary or self-employed	5-10 years	≥30	High	Within normal limits or high	High	Low or optimal	High	High	Intense	Tingling	Abnormal (dirty with visible skin lesions)	Obesity + Dyslipidemia	No treatment	CM and Phytotherapy	Associated medicine	Interrupted for financial reasons	Some problems	Problems with autonomy	Problems	Moderate pain/discomfort	Neither anxious nor depressed
98	GT-UHC	Yes	31-60	Male	Housewive	Bamako	Illiterate	No fixed salary or self-employed	1-5 years	<30	Low or optimal	Optimal	Low or optimal	Low or optimal	Low or optimal	Low or optimal	Low	Burning sensation	Normal (clean without a skin lesion)	Obesity	No treatment	Conventional medicine (CM)	Conventional medicine (CM)	Never a therapeutic interruption	No problem	No problem	No problems	Absence of pain/discomfort	Neither anxious nor depressed
99	GT-UHC	Yes	31-60	Male	Housewive	Bamako	Illiterate	No fixed salary or self-employed	1-5 years	<30	Low or optimal	Optimal	Low or optimal	Low or optimal	Low or optimal	Low or optimal	Moderate	Burning sensation	Normal (clean without a skin lesion)	Obesity	No treatment	CM and Phytotherapy	Associated medicine	Never a therapeutic interruption	No problem	No problem	Problems	Absence of pain/discomfort	Neither anxious nor depressed
100	GT-UHC	No	16-30	Female	Housewive	Bamako	Illiterate	Salary below the SMIG	< 1 year	<30	Low or optimal	Optimal	Low or optimal	High	Low or optimal	Low or optimal	Low	Paresthesia	Normal (clean without a skin lesion)	AHT	No treatment	CM and Phytotherapy	Associated medicine	Never a therapeutic interruption	No problem	No problem	No problems	Absence of pain/discomfort	Neither anxious nor depressed
101	GT-UHC	Yes	31-60	Female	Government empl/retired	Bamako	Primary or secondary	No fixed salary or self-employed	5-10 years	≥30	High	Within normal limits or high	High	High	High	High	Intense	Tingling	Abnormal (dirty with visible skin lesions)	Obesity + Dyslipidemia	No treatment	CM and Phytotherapy	Associated medicine	Interrupted for financial reasons	Some problems	Problems with autonomy	Problems	Moderate pain/discomfort	Neither anxious nor depressed
102	GT-UHC	Yes	31-60	Male	Housewive	Bamako	Illiterate	No fixed salary or self-employed	1-5 years	<30	Low or optimal	Optimal	Low or optimal	Low or optimal	Low or optimal	Low or optimal	Moderate	Burning sensation	Normal (clean without a skin lesion)	Obesity	No treatment	CM and Phytotherapy	Associated medicine	Never a therapeutic interruption	No problem	No problem	Problems	Absence of pain/discomfort	Neither anxious nor depressed
103	CCD	Yes	>60	Female	Blue collar job/merchants	Outside of Bamako	Tertiary	Salary above the SMIG	>10 years	≥30	High	Within normal limits or high	High	High	High	High	Very intense	Numbness	Abnormal (dirty with visible skin lesions)	AHT + dyslipidemia	No treatment	CM and Scarification of the feet	Associated medicine	Interrupted for a traditional treatment	Restricted, bedridden	Incapable of grooming, getting dressed	Incapable	Extreme pain/discomfort	Extremely anxious or depressed
104	CCD	No	31-60	Female	Government empl/retired	Bamako	Arabic / Local language	Salary above the SMIG	1-5 years	<30	Low or optimal	Within normal limits or high	High	High	Low or optimal	High	Moderate	Paresthesia	Normal (clean without a skin lesion)	Dyslipidemia	No treatment	CM and Phytotherapy	Associated medicine	Interrupted for financial reasons	No problem	No problem	No problems	Moderate pain/discomfort	Moderately anxious or depressed
105	GT-UHC	Yes	31-60	Male	Housewive	Bamako	Illiterate	No fixed salary or self-employed	1-5 years	<30	Low or optimal	Optimal	Low or optimal	Low or optimal	Low or optimal	Low or optimal	Low	Burning sensation	Normal (clean without a skin lesion)	Obesity	No treatment	Conventional medicine (CM)	Conventional medicine (CM)	Never a therapeutic interruption	No problem	No problem	No problems	Absence of pain/discomfort	Neither anxious nor depressed
106	GT-UHC	No	16-30	Male	Housewive	Bamako	Illiterate	Salary below the SMIG	< 1 year	<30	Low or optimal	Optimal	Low or optimal	Low or optimal	Low or optimal	Low or optimal	Low	Burning sensation	Normal (clean without a skin lesion)	Obesity	No treatment	Conventional medicine (CM)	Conventional medicine (CM)	Never a therapeutic interruption	No problem	No problem	No problems	Absence of pain/discomfort	Neither anxious nor depressed
107	CCD	No	31-60	Female	Blue collar job/merchants	Bamako	Arabic / Local language	Salary above the SMIG	1-5 years	≥30	High	Within normal limits or high	High	High	High	High	Moderate	Paresthesia	Normal (clean without a skin lesion)	Dyslipidemia	No treatment	CM and Phytotherapy	Associated medicine	Interrupted for financial reasons	No problem	No problem	Problems	Moderate pain/discomfort	Moderately anxious or depressed
108	CCD	Yes	31-60	Female	Government empl/retired	Bamako	Primary or secondary	No fixed salary or self-employed	5-10 years	≥30	High	Within normal limits or high	High	High	High	High	Very intense	Paresthesia	Abnormal (dirty with visible skin lesions)	Obesity + Dyslipidemia	No treatment	CM and Phytotherapy	Associated medicine	Interrupted for financial reasons	Some problems	Problems with autonomy	Problems	Extreme pain/discomfort	Moderately anxious or depressed
109	CCD	Yes	>60	Female	Others	Outside of Bamako	Tertiary	Salary above the SMIG	>10 years	≥30	High	Within normal limits or high	High	High	High	High	Very intense	Numbness	Abnormal (dirty with visible skin lesions)	Obesity + AHT+ Dyslipidemia + Tobacco	No treatment	CM and Scarification of the feet	Associated medicine	Interrupted for a traditional treatment	Restricted, bedridden	Incapable of grooming, getting dressed	Incapable	Extreme pain/discomfort	Extremely anxious or depressed
110	CCD	Yes	31-60	Female	Government empl/retired	Bamako	Primary or secondary	No fixed salary or self-employed	5-10 years	≥30	High	Within normal limits or high	High	High	High	High	Very intense	Paresthesia	Abnormal (dirty with visible skin lesions)	Obesity + Dyslipidemia	No treatment	CM and Phytotherapy	Associated medicine	Interrupted for financial reasons	Some problems	Problems with autonomy	Problems	Extreme pain/discomfort	Moderately anxious or depressed
111	CCD	No	16-30	Female	Government empl/retired	Bamako	Illiterate	Salary above the SMIG	1-5 years	<30	Low or optimal	Optimal	High	High	Low or optimal	Low or optimal	Low	Paresthesia	Normal (clean without a skin lesion)	AHT	No treatment	CM and Phytotherapy	Associated medicine	Never a therapeutic interruption	No problem	No problem	No problems	Absence of pain/discomfort	Moderately anxious or depressed
112	CCD	No	31-60	Female	Blue collar job/merchants	Outside of Bamako	Primary or secondary	Salary above the SMIG	5-10 years	≥30	High	Within normal limits or high	High	High	High	High	Moderate	Paresthesia	Abnormal (dirty with visible skin lesions)	Obesity + AHT	Under treatment	CM and Marabout	Associated medicine	Interrupted for a traditional treatment	No problem	No problem	Problems	Moderate pain/discomfort	Moderately anxious or depressed
113	GT-UHC	Yes	31-60	Female	Government empl/retired	Bamako	Arabic / Local language	No fixed salary or self-employed	5-10 years	≥30	High	Within normal limits or high	High	Low or optimal	High	Low or optimal	Intense	Tingling	Abnormal (dirty with visible skin lesions)	Obesity + AHT	No treatment	CM and Phytotherapy	Associated medicine	Interrupted for financial reasons	Some problems	Problems with autonomy	Problems	Moderate pain/discomfort	Neither anxious nor depressed
114	GT-UHC	Yes	31-60	Female	Housewive	Bamako	Illiterate	No fixed salary or self-employed	1-5 years	<30	Low or optimal	Within normal limits or high	Low or optimal	Low or optimal	Low or optimal	Low or optimal	Intense	Burning sensation	Normal (clean without a skin lesion)	AHT	No treatment	CM and Phytotherapy	Associated medicine	Never a therapeutic interruption	Some problems	No problem	Problems	Moderate pain/discomfort	Neither anxious nor depressed
115	GT-UHC	No	16-30	Male	Housewive	Bamako	Illiterate	Salary below the SMIG	< 1 year	<30	Low or optimal	Optimal	Low or optimal	Low or optimal	Low or optimal	Low or optimal	Low	Burning sensation	Normal (clean without a skin lesion)	Obesity	No treatment	Conventional medicine (CM)	Conventional medicine (CM)	Never a therapeutic interruption	No problem	No problem	No problems	Absence of pain/discomfort	Neither anxious nor depressed
116	GT-UHC	Yes	31-60	Female	Housewive	Bamako	Arabic / Local language	No fixed salary or self-employed	5-10 years	<30	Low or optimal	Within normal limits or high	Low or optimal	Low or optimal	High	Low or optimal	Intense	Tingling	Normal (clean without a skin lesion)	Dyslipidemia	No treatment	CM and Phytotherapy	Associated medicine	Never a therapeutic interruption	Some problems	Problems with autonomy	Problems	Moderate pain/discomfort	Neither anxious nor depressed
117	CCD	Yes	31-60	Female	Government empl/retired	Bamako	Primary or secondary	No fixed salary or self-employed	5-10 years	≥30	High	Within normal limits or high	High	High	High	High	Intense	Paresthesia	Abnormal (dirty with visible skin lesions)	Obesity + Dyslipidemia	No treatment	CM and Phytotherapy	Associated medicine	Interrupted for financial reasons	Some problems	Problems with autonomy	Problems	Extreme pain/discomfort	Moderately anxious or depressed
118	CCD	Yes	>60	Female	Blue collar job/merchants	Bamako	Primary or secondary	Salary below the SMIG	5-10 years	≥30	High	Within normal limits or high	High	High	High	High	Very intense	Paresthesia	Abnormal (dirty with visible skin lesions)	Obesity + Dyslipidemia	No treatment	CM and Phytotherapy	Associated medicine	Interrupted for financial reasons	Some problems	Problems with autonomy	Problems	Extreme pain/discomfort	Moderately anxious or depressed
119	CCD	Yes	>60	Female	Blue collar job/merchants	Outside of Bamako	Primary or secondary	Salary above the SMIG	>10 years	≥30	High	Within normal limits or high	High	High	High	High	Very intense	Numbness	Abnormal (dirty with visible skin lesions)	AHT + dyslipidemia	No treatment	CM and Marabout	Associated medicine	Interrupted for a traditional treatment	Restricted, bedridden	Incapable of grooming, getting dressed	Incapable	Extreme pain/discomfort	Extremely anxious or depressed
120	GT-UHC	Yes	31-60	Male	Housewive	Bamako	Illiterate	No fixed salary or self-employed	1-5 years	<30	Low or optimal	Within normal limits or high	Low or optimal	Low or optimal	Low or optimal	Low or optimal	Moderate	Burning sensation	Normal (clean without a skin lesion)	Obesity	No treatment	CM and Phytotherapy	Associated medicine	Never a therapeutic interruption	No problem	No problem	Problems	Absence of pain/discomfort	Neither anxious nor depressed
121	GT-UHC	Yes	31-60	Female	Housewive	Bamako	Illiterate	No fixed salary or self-employed	1-5 years	<30	Low or optimal	Within normal limits or high	Low or optimal	Low or optimal	Low or optimal	Low or optimal	Moderate	Burning sensation	Normal (clean without a skin lesion)	Obesity	No treatment	CM and Phytotherapy	Associated medicine	Never a therapeutic interruption	No problem	No problem	Problems	Moderate pain/discomfort	Neither anxious nor depressed
122	GT-UHC	Yes	31-60	Male	Housewive	Bamako	Illiterate	No fixed salary or self-employed	1-5 years	<30	Low or optimal	Optimal	Low or optimal	Low or optimal	Low or optimal	Low or optimal	Low	Burning sensation	Normal (clean without a skin lesion)	Obesity	No treatment	Conventional medicine (CM)	Conventional medicine (CM)	Never a therapeutic interruption	No problem	No problem	No problems	Absence of pain/discomfort	Neither anxious nor depressed
123	GT-UHC	Yes	31-60	Female	Housewive	Bamako	Arabic / Local language	No fixed salary or self-employed	5-10 years	<30	Low or optimal	Within normal limits or high	Low or optimal	Low or optimal	High	Low or optimal	Intense	Tingling	Abnormal (dirty with visible skin lesions)	Dyslipidemia	No treatment	CM and Phytotherapy	Associated medicine	Never a therapeutic interruption	Some problems	Problems with autonomy	Problems	Moderate pain/discomfort	Neither anxious nor depressed
124	GT-UHC	Yes	31-60	Male	Housewive	Bamako	Illiterate	No fixed salary or self-employed	1-5 years	<30	Low or optimal	Optimal	Low or optimal	Low or optimal	Low or optimal	Low or optimal	Low	Burning sensation	Normal (clean without a skin lesion)	Obesity	No treatment	Conventional medicine (CM)	Conventional medicine (CM)	Never a therapeutic interruption	No problem	No problem	No problems	Absence of pain/discomfort	Neither anxious nor depressed
125	GT-UHC	Yes	31-60	Female	Housewive	Bamako	Arabic / Local language	No fixed salary or self-employed	5-10 years	<30	Low or optimal	Within normal limits or high	Low or optimal	Low or optimal	High	Low or optimal	Intense	Tingling	Abnormal (dirty with visible skin lesions)	Dyslipidemia	No treatment	CM and Phytotherapy	Associated medicine	Never a therapeutic interruption	Some problems	Problems with autonomy	Problems	Moderate pain/discomfort	Neither anxious nor depressed
126	CCD	Yes	>60	Female	Blue collar job/merchants	Outside of Bamako	Primary or secondary	Salary above the SMIG	>10 years	≥30	High	Within normal limits or high	High	High	High	High	Very intense	Numbness	Abnormal (dirty with visible skin lesions)	AHT + dyslipidemia	No treatment	CM and Marabout	Associated medicine	Interrupted for financial reasons	Restricted, bedridden	Incapable of grooming, getting dressed	Incapable	Extreme pain/discomfort	Extremely anxious or depressed
127	GT-UHC	Yes	31-60	Female	Government empl/retired	Bamako	Primary or secondary	No fixed salary or self-employed	5-10 years	≥30	High	Within normal limits or high	High	High	High	High	Intense	Tingling	Abnormal (dirty with visible skin lesions)	Obesity + Dyslipidemia	No treatment	CM and Phytotherapy	Associated medicine	Interrupted for financial reasons	Some problems	Problems with autonomy	Problems	Moderate pain/discomfort	Neither anxious nor depressed
128	CCD	Yes	>60	Female	Blue collar job/merchants	Bamako	Primary or secondary	Salary above the SMIG	5-10 years	≥30	High	Within normal limits or high	High	High	High	High	Very intense	Searing pain	Abnormal (dirty with visible skin lesions)	Obesity + Dyslipidemia	No treatment	CM and Phytotherapy	Associated medicine	Interrupted for financial reasons	Some problems	Problems with autonomy	Incapable	Extreme pain/discomfort	Moderately anxious or depressed
129	CCD	Yes	>60	Female	Blue collar job/merchants	Outside of Bamako	Primary or secondary	Salary above the SMIG	>10 years	≥30	High	Within normal limits or high	High	High	High	High	Very intense	Searing pain	Abnormal (dirty with visible skin lesions)	Obesity + Tobacco	No treatment	CM and Marabout	Associated medicine	Interrupted for financial reasons	Restricted, bedridden	Incapable of grooming, getting dressed	Incapable	Extreme pain/discomfort	Extremely anxious or depressed
130	CCD	No	31-60	Female	Blue collar job/merchants	Outside of Bamako	Tertiary	Salary above the SMIG	5-10 years	≥30	High	Within normal limits or high	High	High	High	High	Intense	Paresthesia	Abnormal (dirty with visible skin lesions)	Obesity + Tobacco	Under treatment	CM and Marabout	Associated medicine	Interrupted for a traditional treatment	Some problems	Missing	Problems	Moderate pain/discomfort	Moderately anxious or depressed
131	GT-UHC	Yes	31-60	Female	Housewive	Bamako	Illiterate	No fixed salary or self-employed	1-5 years	<30	Low or optimal	Within normal limits or high	Low or optimal	Low or optimal	Low or optimal	Low or optimal	Moderate	Burning sensation	Normal (clean without a skin lesion)	AHT	No treatment	CM and Phytotherapy	Associated medicine	Never a therapeutic interruption	No problem	No problem	Problems	Moderate pain/discomfort	Neither anxious nor depressed
132	CCD	Yes	>60	Female	Blue collar job/merchants	Bamako	Primary or secondary	Salary below the SMIG	5-10 years	≥30	High	Within normal limits or high	High	High	High	High	Very intense	Paresthesia	Abnormal (dirty with visible skin lesions)	Obesity + Dyslipidemia	No treatment	CM and Phytotherapy	Associated medicine	Interrupted for financial reasons	Some problems	Problems with autonomy	Problems	Extreme pain/discomfort	Moderately anxious or depressed
133	GT-UHC	Yes	31-60	Female	Housewive	Bamako	Illiterate	No fixed salary or self-employed	1-5 years	<30	Low or optimal	Within normal limits or high	Low or optimal	Low or optimal	Low or optimal	Low or optimal	Moderate	Burning sensation	Normal (clean without a skin lesion)	AHT	No treatment	CM and Phytotherapy	Associated medicine	Never a therapeutic interruption	No problem	No problem	Problems	Moderate pain/discomfort	Neither anxious nor depressed
134	CCD	No	31-60	Female	Blue collar job/merchants	Outside of Bamako	Primary or secondary	Salary above the SMIG	1-5 years	≥30	High	Within normal limits or high	High	High	High	High	Moderate	Paresthesia	Abnormal (dirty with visible skin lesions)	Dyslipidemia	Under treatment	CM and Marabout	Associated medicine	Interrupted due to unavailability	No problem	No problem	Problems	Moderate pain/discomfort	Moderately anxious or depressed
135	GT-UHC	Yes	31-60	Female	Housewive	Bamako	Illiterate	No fixed salary or self-employed	1-5 years	<30	Low or optimal	Within normal limits or high	Low or optimal	Low or optimal	Low or optimal	Low or optimal	Moderate	Burning sensation	Normal (clean without a skin lesion)	Obesity	No treatment	CM and Phytotherapy	Associated medicine	Never a therapeutic interruption	No problem	No problem	Problems	Absence of pain/discomfort	Neither anxious nor depressed
136	GT-UHC	Yes	31-60	Male	Housewive	Bamako	Illiterate	No fixed salary or self-employed	1-5 years	<30	Low or optimal	Optimal	Low or optimal	Low or optimal	Low or optimal	Low or optimal	Low	Burning sensation	Normal (clean without a skin lesion)	Obesity	No treatment	Conventional medicine (CM)	Conventional medicine (CM)	Never a therapeutic interruption	No problem	No problem	No problems	Absence of pain/discomfort	Neither anxious nor depressed
137	CCD	No	16-30	Female	Housewive	Bamako	Illiterate	Salary above the SMIG	< 1 year	<30	Low or optimal	Optimal	Low or optimal	High	Low or optimal	Low or optimal	Low	Paresthesia	Normal (clean without a skin lesion)	AHT	No treatment	CM and Phytotherapy	Associated medicine	Never a therapeutic interruption	No problem	No problem	No problems	Absence of pain/discomfort	Neither anxious nor depressed
138	GT-UHC	No	16-30	Male	Housewive	Bamako	Illiterate	Salary below the SMIG	< 1 year	<30	Low or optimal	Optimal	Low or optimal	High	Low or optimal	Low or optimal	Low	Paresthesia	Normal (clean without a skin lesion)	Obesity	No treatment	CM and Phytotherapy	Associated medicine	Never a therapeutic interruption	No problem	No problem	No problems	Absence of pain/discomfort	Neither anxious nor depressed
139	GT-UHC	Yes	31-60	Male	Housewive	Bamako	Illiterate	No fixed salary or self-employed	1-5 years	<30	Low or optimal	Within normal limits or high	Low or optimal	Low or optimal	Low or optimal	Low or optimal	Moderate	Burning sensation	Normal (clean without a skin lesion)	Obesity	No treatment	CM and Phytotherapy	Associated medicine	Never a therapeutic interruption	No problem	No problem	Problems	Absence of pain/discomfort	Neither anxious nor depressed
140	GT-UHC	Yes	31-60	Female	Housewive	Bamako	Illiterate	No fixed salary or self-employed	1-5 years	<30	Low or optimal	Within normal limits or high	Low or optimal	Low or optimal	Low or optimal	Low or optimal	Intense	Burning sensation	Normal (clean without a skin lesion)	AHT	No treatment	CM and Phytotherapy	Associated medicine	Never a therapeutic interruption	No problem	No problem	Problems	Moderate pain/discomfort	Neither anxious nor depressed
141	GT-UHC	No	16-30	Male	Housewive	Bamako	Illiterate	Salary below the SMIG	< 1 year	<30	Low or optimal	Optimal	Low or optimal	High	Low or optimal	Low or optimal	Low	Paresthesia	Normal (clean without a skin lesion)	AHT	No treatment	CM and Phytotherapy	Associated medicine	Never a therapeutic interruption	No problem	No problem	No problems	Absence of pain/discomfort	Neither anxious nor depressed
142	GT-UHC	Yes	31-60	Female	Government empl/retired	Bamako	Arabic / Local language	No fixed salary or self-employed	5-10 years	≥30	High	Within normal limits or high	High	Low or optimal	High	Low or optimal	Intense	Tingling	Abnormal (dirty with visible skin lesions)	Obesity + AHT	No treatment	CM and Phytotherapy	Associated medicine	Interrupted for financial reasons	Some problems	Problems with autonomy	Problems	Moderate pain/discomfort	Neither anxious nor depressed
143	GT-UHC	Yes	31-60	Female	Housewive	Bamako	Arabic / Local language	No fixed salary or self-employed	5-10 years	<30	Low or optimal	Within normal limits or high	Low or optimal	Low or optimal	High	Low or optimal	Intense	Tingling	Normal (clean without a skin lesion)	Dyslipidemia	No treatment	CM and Phytotherapy	Associated medicine	Never a therapeutic interruption	Some problems	Problems with autonomy	Problems	Moderate pain/discomfort	Neither anxious nor depressed
144	CCD	No	16-30	Female	Housewive	Bamako	Illiterate	Salary above the SMIG	< 1 year	<30	Low or optimal	Optimal	Low or optimal	High	Low or optimal	Low or optimal	Low	Paresthesia	Normal (clean without a skin lesion)	AHT	No treatment	CM and Phytotherapy	Associated medicine	Never a therapeutic interruption	No problem	No problem	No problems	Absence of pain/discomfort	Neither anxious nor depressed
145	CCD	Yes	31-60	Female	Government empl/retired	Bamako	Primary or secondary	No fixed salary or self-employed	5-10 years	≥30	High	Within normal limits or high	High	High	High	High	Very intense	Paresthesia	Abnormal (dirty with visible skin lesions)	Obesity + Dyslipidemia	No treatment	CM and Phytotherapy	Associated medicine	Interrupted for financial reasons	Some problems	Problems with autonomy	Problems	Extreme pain/discomfort	Moderately anxious or depressed
146	GT-UHC	No	16-30	Male	Housewive	Bamako	Illiterate	Salary below the SMIG	< 1 year	<30	Low or optimal	Optimal	Low or optimal	Low or optimal	Low or optimal	Low or optimal	Low	Burning sensation	Normal (clean without a skin lesion)	Obesity	No treatment	Conventional medicine (CM)	Conventional medicine (CM)	Never a therapeutic interruption	No problem	No problem	No problems	Absence of pain/discomfort	Neither anxious nor depressed
147	CCD	Yes	>60	Female	Blue collar job/merchants	Bamako	Primary or secondary	Salary above the SMIG	5-10 years	≥30	High	Within normal limits or high	High	High	High	High	Very intense	Searing pain	Abnormal (dirty with visible skin lesions)	Obesity + Dyslipidemia	No treatment	CM and Marabout	Associated medicine	Interrupted for financial reasons	Some problems	Problems with autonomy	Incapable	Extreme pain/discomfort	Moderately anxious or depressed
148	CCD	Yes	>60	Female	Blue collar job/merchants	Bamako	Primary or secondary	Salary below the SMIG	5-10 years	≥30	High	Within normal limits or high	High	High	High	High	Very intense	Paresthesia	Abnormal (dirty with visible skin lesions)	Obesity + Dyslipidemia	No treatment	CM and Phytotherapy	Associated medicine	Interrupted for financial reasons	Some problems	Problems with autonomy	Problems	Extreme pain/discomfort	Moderately anxious or depressed
149	GT-UHC	No	16-30	Male	Housewive	Bamako	Illiterate	Salary below the SMIG	< 1 year	<30	Low or optimal	Optimal	Low or optimal	Low or optimal	Low or optimal	Low or optimal	Low	Burning sensation	Normal (clean without a skin lesion)	Obesity	No treatment	Conventional medicine (CM)	Conventional medicine (CM)	Never a therapeutic interruption	No problem	No problem	No problems	Absence of pain/discomfort	Neither anxious nor depressed
150	GT-UHC	Yes	31-60	Female	Housewive	Bamako	Arabic / Local language	No fixed salary or self-employed	5-10 years	<30	Low or optimal	Within normal limits or high	Low or optimal	Low or optimal	Low or optimal	Low or optimal	Intense	Tingling	Normal (clean without a skin lesion)	Dyslipidemia	No treatment	CM and Phytotherapy	Associated medicine	Never a therapeutic interruption	Some problems	Problems with autonomy	Problems	Moderate pain/discomfort	Neither anxious nor depressed
151	CCD	No	31-60	Female	Blue collar job/merchants	Outside of Bamako	Tertiary	Salary above the SMIG	5-10 years	≥30	High	Within normal limits or high	High	High	High	High	Intense	Paresthesia	Abnormal (dirty with visible skin lesions)	Obesity + AHT	Under treatment	CM and Marabout	Associated medicine	Interrupted for a traditional treatment	Some problems	No problem	Problems	Moderate pain/discomfort	Moderately anxious or depressed
152	CCD	No	>60	Female	Others	Outside of Bamako	Tertiary	Salary above the SMIG	>10 years	≥30	High	Within normal limits or high	High	High	High	High	Very intense	Numbness	Abnormal (dirty with visible skin lesions)	Obesity + AHT+ Dyslipidemia + Tobacco	Under treatment	CM and Scarification of the feet	Associated medicine	Interrupted for a traditional treatment	Restricted, bedridden	Missing	Problems	Extreme pain/discomfort	Extremely anxious or depressed
153	GT-UHC	Yes	16-30	Male	Housewive	Bamako	Illiterate	No fixed salary or self-employed	< 1 year	<30	Low or optimal	Optimal	Low or optimal	Low or optimal	Low or optimal	Low or optimal	Low	Burning sensation	Normal (clean without a skin lesion)	Obesity	No treatment	Conventional medicine (CM)	Conventional medicine (CM)	Never a therapeutic interruption	No problem	No problem	No problems	Absence of pain/discomfort	Neither anxious nor depressed
154	CCD	No	16-30	Female	Government empl/retired	Bamako	Arabic / Local language	Salary above the SMIG	1-5 years	<30	Low or optimal	Optimal	High	High	Low or optimal	Low or optimal	Moderate	Paresthesia	Normal (clean without a skin lesion)	Dyslipidemia	No treatment	CM and Phytotherapy	Associated medicine	Interrupted for financial reasons	No problem	No problem	No problems	Moderate pain/discomfort	Moderately anxious or depressed
155	GT-UHC	Yes	31-60	Male	Housewive	Bamako	Illiterate	No fixed salary or self-employed	< 1 year	<30	Low or optimal	Optimal	Low or optimal	Low or optimal	Low or optimal	Low or optimal	Low	Burning sensation	Normal (clean without a skin lesion)	Obesity	Under treatment	Conventional medicine (CM)	Conventional medicine (CM)	Never a therapeutic interruption	No problem	No problem	No problems	Absence of pain/discomfort	Neither anxious nor depressed
156	GT-UHC	No	16-30	Male	Housewive	Bamako	Illiterate	Salary below the SMIG	< 1 year	<30	Low or optimal	Optimal	Low or optimal	High	Low or optimal	Low or optimal	Low	Paresthesia	Normal (clean without a skin lesion)	AHT	No treatment	CM and Phytotherapy	Associated medicine	Never a therapeutic interruption	No problem	No problem	No problems	Absence of pain/discomfort	Neither anxious nor depressed
157	GT-UHC	Yes	31-60	Male	Housewive	Bamako	Illiterate	No fixed salary or self-employed	1-5 years	<30	Low or optimal	Optimal	Low or optimal	Low or optimal	Low or optimal	Low or optimal	Low	Burning sensation	Normal (clean without a skin lesion)	Obesity	Under treatment	Conventional medicine (CM)	Conventional medicine (CM)	Never a therapeutic interruption	No problem	No problem	No problems	Absence of pain/discomfort	Neither anxious nor depressed
158	CCD	Yes	>60	Female	Blue collar job/merchants	Bamako	Primary or secondary	Salary below the SMIG	5-10 years	≥30	High	Within normal limits or high	High	High	High	High	Very intense	Paresthesia	Abnormal (dirty with visible skin lesions)	Obesity + Dyslipidemia	No treatment	CM and Phytotherapy	Associated medicine	Interrupted for financial reasons	Some problems	Problems with autonomy	Incapable	Extreme pain/discomfort	Moderately anxious or depressed
159	GT-UHC	Yes	31-60	Female	Housewive	Bamako	Arabic / Local language	No fixed salary or self-employed	1-5 years	<30	Low or optimal	Within normal limits or high	Low or optimal	Low or optimal	Low or optimal	Low or optimal	Intense	Tingling	Normal (clean without a skin lesion)	Dyslipidemia	Under treatment	CM and Phytotherapy	Associated medicine	Never a therapeutic interruption	Some problems	Problems with autonomy	Problems	Moderate pain/discomfort	Neither anxious nor depressed
160	CCD	No	31-60	Female	Blue collar job/merchants	Outside of Bamako	Tertiary	Salary above the SMIG	5-10 years	≥30	High	Within normal limits or high	High	High	High	High	Intense	Paresthesia	Abnormal (dirty with visible skin lesions)	Obesity + AHT	Under treatment	CM and Marabout	Associated medicine	Interrupted for a traditional treatment	Some problems	No problem	Problems	Moderate pain/discomfort	Moderately anxious or depressed
161	GT-UHC	No	16-30	Female	Housewive	Bamako	Illiterate	Salary below the SMIG	< 1 year	<30	Low or optimal	Optimal	Low or optimal	High	Low or optimal	Low or optimal	Low	Paresthesia	Normal (clean without a skin lesion)	AHT	No treatment	CM and Phytotherapy	Associated medicine	Never a therapeutic interruption	No problem	No problem	No problems	Absence of pain/discomfort	Neither anxious nor depressed
162	CCD	No	31-60	Female	Blue collar job/merchants	Bamako	Primary or secondary	Salary above the SMIG	1-5 years	≥30	High	Within normal limits or high	High	High	High	High	Moderate	Paresthesia	Normal (clean without a skin lesion)	Dyslipidemia	Under treatment	CM and Marabout	Associated medicine	Interrupted due to unavailability	No problem	No problem	Problems	Moderate pain/discomfort	Moderately anxious or depressed
163	CCD	Yes	>60	Female	Blue collar job/merchants	Bamako	Primary or secondary	Salary below the SMIG	5-10 years	≥30	High	Within normal limits or high	High	High	High	High	Very intense	Paresthesia	Abnormal (dirty with visible skin lesions)	Obesity + Dyslipidemia	No treatment	CM and Phytotherapy	Associated medicine	Interrupted for financial reasons	Some problems	Problems with autonomy	Problems	Extreme pain/discomfort	Moderately anxious or depressed
164	CCD	Yes	>60	Female	Blue collar job/merchants	Bamako	Primary or secondary	Salary below the SMIG	5-10 years	≥30	High	Within normal limits or high	High	High	High	High	Very intense	Paresthesia	Abnormal (dirty with visible skin lesions)	Obesity + Dyslipidemia	No treatment	CM and Phytotherapy	Associated medicine	Interrupted for financial reasons	Some problems	Problems with autonomy	Incapable	Extreme pain/discomfort	Moderately anxious or depressed
165	GT-UHC	No	16-30	Female	Housewive	Bamako	Illiterate	Salary below the SMIG	< 1 year	<30	Low or optimal	Optimal	Low or optimal	High	Low or optimal	Low or optimal	Low	Paresthesia	Normal (clean without a skin lesion)	AHT	No treatment	CM and Phytotherapy	Associated medicine	Never a therapeutic interruption	No problem	No problem	No problems	Absence of pain/discomfort	Neither anxious nor depressed
166	GT-UHC	Yes	31-60	Female	Housewive	Bamako	Illiterate	No fixed salary or self-employed	1-5 years	<30	Low or optimal	Within normal limits or high	Low or optimal	Low or optimal	Low or optimal	Low or optimal	Intense	Burning sensation	Normal (clean without a skin lesion)	AHT	Under treatment	CM and Phytotherapy	Associated medicine	Never a therapeutic interruption	No problem	No problem	Problems	Moderate pain/discomfort	Neither anxious nor depressed
167	CCD	Yes	>60	Female	Blue collar job/merchants	Bamako	Primary or secondary	Salary below the SMIG	5-10 years	≥30	High	Within normal limits or high	High	High	High	High	Very intense	Searing pain	Abnormal (dirty with visible skin lesions)	Obesity + Dyslipidemia	No treatment	CM and Phytotherapy	Associated medicine	Interrupted for financial reasons	Some problems	Problems with autonomy	Incapable	Extreme pain/discomfort	Moderately anxious or depressed
168	CCD	No	31-60	Female	Blue collar job/merchants	Outside of Bamako	Primary or secondary	Salary above the SMIG	1-5 years	≥30	High	Within normal limits or high	High	High	High	High	Moderate	Paresthesia	Abnormal (dirty with visible skin lesions)	Tobacco	Under treatment	CM and Marabout	Associated medicine	Interrupted due to unavailability	No problem	No problem	Problems	Moderate pain/discomfort	Moderately anxious or depressed
169	CCD	No	31-60	Female	Government empl/retired	Bamako	Arabic / Local language	Salary above the SMIG	1-5 years	<30	Low or optimal	Within normal limits or high	High	High	Low or optimal	High	Moderate	Paresthesia	Normal (clean without a skin lesion)	Dyslipidemia	No treatment	CM and Phytotherapy	Associated medicine	Interrupted for financial reasons	No problem	No problem	No problems	Moderate pain/discomfort	Moderately anxious or depressed
170	CCD	No	31-60	Female	Blue collar job/merchants	Outside of Bamako	Primary or secondary	Salary above the SMIG	5-10 years	≥30	High	Within normal limits or high	High	High	High	High	Moderate	Paresthesia	Abnormal (dirty with visible skin lesions)	Tobacco	Under treatment	CM and Marabout	Associated medicine	Interrupted due to unavailability	No problem	No problem	Problems	Moderate pain/discomfort	Moderately anxious or depressed
171	CCD	Yes	>60	Female	Blue collar job/merchants	Outside of Bamako	Primary or secondary	Salary above the SMIG	>10 years	≥30	High	Within normal limits or high	High	High	High	High	Very intense	Searing pain	Abnormal (dirty with visible skin lesions)	Obesity + Dyslipidemia	Under treatment	CM and Marabout	Associated medicine	Interrupted for financial reasons	Restricted, bedridden	Incapable of grooming, getting dressed	Incapable	Extreme pain/discomfort	Extremely anxious or depressed
172	GT-UHC	Yes	31-60	Female	Government empl/retired	Bamako	Arabic / Local language	No fixed salary or self-employed	5-10 years	≥30	High	Within normal limits or high	High	Low or optimal	High	Low or optimal	Intense	Tingling	Abnormal (dirty with visible skin lesions)	Obesity + AHT	Under treatment	CM and Phytotherapy	Associated medicine	Interrupted for financial reasons	Some problems	Problems with autonomy	Problems	Moderate pain/discomfort	Neither anxious nor depressed
173	CCD	Yes	>60	Female	Blue collar job/merchants	Outside of Bamako	Primary or secondary	Salary above the SMIG	>10 years	≥30	High	Within normal limits or high	High	High	High	High	Very intense	Numbness	Abnormal (dirty with visible skin lesions)	AHT + dyslipidemia	Under treatment	CM and Marabout	Associated medicine	Interrupted for financial reasons	Restricted, bedridden	Incapable of grooming, getting dressed	Incapable	Extreme pain/discomfort	Extremely anxious or depressed
174	CCD	Yes	>60	Female	Blue collar job/merchants	Outside of Bamako	Tertiary	Salary above the SMIG	>10 years	≥30	High	Within normal limits or high	High	High	High	High	Very intense	Numbness	Abnormal (dirty with visible skin lesions)	AHT + dyslipidemia	Under treatment	CM and Scarification of the feet	Associated medicine	Interrupted for a traditional treatment	Restricted, bedridden	Incapable of grooming, getting dressed	Incapable	Extreme pain/discomfort	Extremely anxious or depressed
175	GT-UHC	No	16-30	Male	Housewive	Bamako	Illiterate	Salary below the SMIG	< 1 year	<30	Low or optimal	Optimal	Low or optimal	Low or optimal	Low or optimal	Low or optimal	Low	Burning sensation	Normal (clean without a skin lesion)	Obesity	No treatment	Conventional medicine (CM)	Conventional medicine (CM)	Never a therapeutic interruption	No problem	No problem	No problems	Absence of pain/discomfort	Neither anxious nor depressed
176	GT-UHC	Yes	31-60	Male	Housewive	Bamako	Illiterate	No fixed salary or self-employed	1-5 years	<30	Low or optimal	Within normal limits or high	Low or optimal	Low or optimal	Low or optimal	Low or optimal	Moderate	Burning sensation	Normal (clean without a skin lesion)	Obesity	Under treatment	CM and Phytotherapy	Associated medicine	Never a therapeutic interruption	No problem	No problem	Problems	Absence of pain/discomfort	Neither anxious nor depressed
177	GT-UHC	Yes	31-60	Male	Housewive	Bamako	Illiterate	No fixed salary or self-employed	1-5 years	<30	Low or optimal	Optimal	Low or optimal	Low or optimal	Low or optimal	Low or optimal	Moderate	Burning sensation	Normal (clean without a skin lesion)	Obesity	Under treatment	CM and Phytotherapy	Associated medicine	Never a therapeutic interruption	No problem	No problem	No problems	Absence of pain/discomfort	Neither anxious nor depressed
178	GT-UHC	Yes	31-60	Male	Housewive	Bamako	Illiterate	No fixed salary or self-employed	< 1 year	<30	Low or optimal	Optimal	Low or optimal	Low or optimal	Low or optimal	Low or optimal	Low	Burning sensation	Normal (clean without a skin lesion)	Obesity	Under treatment	Conventional medicine (CM)	Conventional medicine (CM)	Never a therapeutic interruption	No problem	No problem	No problems	Absence of pain/discomfort	Neither anxious nor depressed
179	GT-UHC	No	16-30	Male	Housewive	Bamako	Illiterate	Salary below the SMIG	< 1 year	<30	Low or optimal	Optimal	Low or optimal	Low or optimal	Low or optimal	Low or optimal	Low	Burning sensation	Normal (clean without a skin lesion)	Obesity	No treatment	Conventional medicine (CM)	Conventional medicine (CM)	Never a therapeutic interruption	No problem	No problem	No problems	Absence of pain/discomfort	Neither anxious nor depressed
180	CCD	Yes	>60	Female	Others	Outside of Bamako	Tertiary	Salary above the SMIG	>10 years	≥30	High	Within normal limits or high	High	High	High	High	Very intense	Numbness	Abnormal (dirty with visible skin lesions)	Obesity + AHT+ Dyslipidemia + Tobacco	Under treatment	CM and Scarification of the feet	Associated medicine	Interrupted for a traditional treatment	Restricted, bedridden	Incapable of grooming, getting dressed	Incapable	Extreme pain/discomfort	Extremely anxious or depressed
181	GT-UHC	Yes	31-60	Female	Housewive	Bamako	Arabic / Local language	No fixed salary or self-employed	5-10 years	<30	Low or optimal	Within normal limits or high	Low or optimal	Low or optimal	High	Low or optimal	Intense	Tingling	Normal (clean without a skin lesion)	Dyslipidemia	Under treatment	CM and Phytotherapy	Associated medicine	Never a therapeutic interruption	Some problems	Problems with autonomy	Problems	Moderate pain/discomfort	Neither anxious nor depressed
182	CCD	Yes	31-60	Female	Government empl/retired	Bamako	Primary or secondary	No fixed salary or self-employed	5-10 years	≥30	High	Within normal limits or high	High	High	High	High	Very intense	Paresthesia	Abnormal (dirty with visible skin lesions)	Obesity + Dyslipidemia	Under treatment	CM and Phytotherapy	Associated medicine	Interrupted for financial reasons	Some problems	Problems with autonomy	Problems	Extreme pain/discomfort	Moderately anxious or depressed
183	CCD	Yes	>60	Female	Blue collar job/merchants	Bamako	Primary or secondary	Salary above the SMIG	5-10 years	≥30	High	Within normal limits or high	High	High	High	High	Very intense	Searing pain	Abnormal (dirty with visible skin lesions)	Obesity + Dyslipidemia	Under treatment	CM and Marabout	Associated medicine	Interrupted for financial reasons	Some problems	Incapable of grooming, getting dressed	Incapable	Extreme pain/discomfort	Moderately anxious or depressed
184	GT-UHC	Yes	16-30	Male	Housewive	Bamako	Illiterate	No fixed salary or self-employed	< 1 year	<30	Low or optimal	Optimal	Low or optimal	Low or optimal	Low or optimal	Low or optimal	Low	Burning sensation	Normal (clean without a skin lesion)	Obesity	Under treatment	Conventional medicine (CM)	Conventional medicine (CM)	Never a therapeutic interruption	No problem	No problem	No problems	Absence of pain/discomfort	Neither anxious nor depressed
185	CCD	Yes	>60	Female	Blue collar job/merchants	Bamako	Primary or secondary	Salary above the SMIG	5-10 years	≥30	High	Within normal limits or high	High	High	High	High	Very intense	Searing pain	Abnormal (dirty with visible skin lesions)	Obesity + Dyslipidemia	Under treatment	CM and Phytotherapy	Associated medicine	Interrupted for financial reasons	Some problems	Problems with autonomy	Incapable	Extreme pain/discomfort	Moderately anxious or depressed
186	GT-UHC	Yes	31-60	Female	Housewive	Bamako	Illiterate	No fixed salary or self-employed	1-5 years	<30	Low or optimal	Within normal limits or high	Low or optimal	Low or optimal	Low or optimal	Low or optimal	Intense	Burning sensation	Normal (clean without a skin lesion)	AHT	Under treatment	CM and Phytotherapy	Associated medicine	Never a therapeutic interruption	No problem	No problem	Problems	Moderate pain/discomfort	Neither anxious nor depressed
187	CCD	Yes	>60	Female	Blue collar job/merchants	Outside of Bamako	Primary or secondary	Salary above the SMIG	5-10 years	≥30	High	Within normal limits or high	High	High	High	High	Very intense	Searing pain	Abnormal (dirty with visible skin lesions)	Obesity + Dyslipidemia	Under treatment	CM and Marabout	Associated medicine	Interrupted for financial reasons	Some problems	Incapable of grooming, getting dressed	Incapable	Extreme pain/discomfort	Extremely anxious or depressed
188	GT-UHC	Yes	16-30	Male	Housewive	Bamako	Illiterate	No fixed salary or self-employed	< 1 year	<30	Low or optimal	Optimal	Low or optimal	Low or optimal	Low or optimal	Low or optimal	Low	Burning sensation	Normal (clean without a skin lesion)	Obesity	Under treatment	Conventional medicine (CM)	Conventional medicine (CM)	Never a therapeutic interruption	No problem	No problem	No problems	Absence of pain/discomfort	Neither anxious nor depressed
189	GT-UHC	Yes	31-60	Female	Housewive	Bamako	Arabic / Local language	No fixed salary or self-employed	1-5 years	<30	Low or optimal	Within normal limits or high	Low or optimal	Low or optimal	Low or optimal	Low or optimal	Intense	Tingling	Normal (clean without a skin lesion)	Dyslipidemia	Under treatment	CM and Phytotherapy	Associated medicine	Never a therapeutic interruption	Some problems	Problems with autonomy	Problems	Moderate pain/discomfort	Neither anxious nor depressed
190	GT-UHC	Yes	31-60	Female	Government empl/retired	Bamako	Arabic / Local language	No fixed salary or self-employed	5-10 years	≥30	High	Within normal limits or high	High	Low or optimal	High	Low or optimal	Intense	Tingling	Abnormal (dirty with visible skin lesions)	Obesity + AHT	Under treatment	CM and Phytotherapy	Associated medicine	Interrupted for financial reasons	Some problems	Problems with autonomy	Problems	Moderate pain/discomfort	Neither anxious nor depressed
191	GT-UHC	No	16-30	Male	Housewive	Bamako	Illiterate	Salary below the SMIG	< 1 year	<30	Low or optimal	Optimal	Low or optimal	Low or optimal	Low or optimal	Low or optimal	Low	Burning sensation	Normal (clean without a skin lesion)	Obesity	No treatment	Conventional medicine (CM)	Conventional medicine (CM)	Never a therapeutic interruption	No problem	No problem	No problems	Absence of pain/discomfort	Neither anxious nor depressed
192	GT-UHC	Yes	31-60	Male	Housewive	Bamako	Illiterate	No fixed salary or self-employed	1-5 years	<30	Low or optimal	Within normal limits or high	Low or optimal	Low or optimal	Low or optimal	Low or optimal	Moderate	Burning sensation	Normal (clean without a skin lesion)	Obesity	Under treatment	CM and Phytotherapy	Associated medicine	Never a therapeutic interruption	No problem	No problem	Problems	Absence of pain/discomfort	Neither anxious nor depressed
193	CCD	Yes	>60	Female	Blue collar job/merchants	Outside of Bamako	Primary or secondary	Salary above the SMIG	5-10 years	≥30	High	Within normal limits or high	High	High	High	High	Very intense	Searing pain	Abnormal (dirty with visible skin lesions)	Obesity + Dyslipidemia	Under treatment	CM and Marabout	Associated medicine	Interrupted for financial reasons	Restricted, bedridden	Incapable of grooming, getting dressed	Incapable	Extreme pain/discomfort	Extremely anxious or depressed
194	CCD	No	16-30	Female	Government empl/retired	Bamako	Arabic / Local language	Salary above the SMIG	1-5 years	<30	Low or optimal	Optimal	High	High	Low or optimal	Low or optimal	Moderate	Paresthesia	Normal (clean without a skin lesion)	Dyslipidemia	No treatment	CM and Phytotherapy	Associated medicine	Interrupted for financial reasons	No problem	No problem	No problems	Moderate pain/discomfort	Moderately anxious or depressed
195	GT-UHC	Yes	31-60	Male	Housewive	Bamako	Illiterate	No fixed salary or self-employed	1-5 years	<30	Low or optimal	Optimal	Low or optimal	Low or optimal	Low or optimal	Low or optimal	Moderate	Burning sensation	Normal (clean without a skin lesion)	Obesity	Under treatment	CM and Phytotherapy	Associated medicine	Never a therapeutic interruption	No problem	No problem	Problems	Absence of pain/discomfort	Neither anxious nor depressed
196	GT-UHC	Yes	31-60	Male	Housewive	Bamako	Illiterate	No fixed salary or self-employed	1-5 years	<30	Low or optimal	Within normal limits or high	Low or optimal	Low or optimal	Low or optimal	Low or optimal	Moderate	Burning sensation	Normal (clean without a skin lesion)	Obesity	Under treatment	CM and Phytotherapy	Associated medicine	Never a therapeutic interruption	No problem	No problem	Problems	Absence of pain/discomfort	Neither anxious nor depressed
197	CCD	No	16-30	Female	Government empl/retired	Bamako	Arabic / Local language	Salary above the SMIG	1-5 years	<30	Low or optimal	Optimal	High	High	Low or optimal	Low or optimal	Moderate	Paresthesia	Normal (clean without a skin lesion)	Dyslipidemia	No treatment	CM and Phytotherapy	Associated medicine	Interrupted for financial reasons	No problem	No problem	No problems	Moderate pain/discomfort	Moderately anxious or depressed
198	GT-UHC	No	16-30	Male	Housewive	Bamako	Illiterate	Salary below the SMIG	< 1 year	<30	Low or optimal	Optimal	Low or optimal	Low or optimal	Low or optimal	Low or optimal	Low	Burning sensation	Normal (clean without a skin lesion)	Obesity	No treatment	Conventional medicine (CM)	Conventional medicine (CM)	Never a therapeutic interruption	No problem	No problem	No problems	Absence of pain/discomfort	Neither anxious nor depressed
199	GT-UHC	Yes	31-60	Male	Housewive	Bamako	Illiterate	No fixed salary or self-employed	1-5 years	<30	Low or optimal	Within normal limits or high	Low or optimal	Low or optimal	Low or optimal	Low or optimal	Moderate	Burning sensation	Normal (clean without a skin lesion)	Obesity	Under treatment	CM and Phytotherapy	Associated medicine	Never a therapeutic interruption	No problem	No problem	Problems	Absence of pain/discomfort	Neither anxious nor depressed
200	CCD	Yes	>60	Female	Blue collar job/merchants	Outside of Bamako	Primary or secondary	Salary above the SMIG	>10 years	≥30	High	Within normal limits or high	High	High	High	High	Very intense	Searing pain	Abnormal (dirty with visible skin lesions)	Obesity + Dyslipidemia	Under treatment	CM and Marabout	Associated medicine	Interrupted for financial reasons	Restricted, bedridden	Incapable of grooming, getting dressed	Incapable	Extreme pain/discomfort	Extremely anxious or depressed
201	GT-UHC	No	16-30	Male	Housewive	Bamako	Illiterate	No fixed salary or self-employed	< 1 year	<30	Low or optimal	Optimal	Low or optimal	Low or optimal	Low or optimal	Low or optimal	Low	Burning sensation	Normal (clean without a skin lesion)	Obesity	Under treatment	Conventional medicine (CM)	Conventional medicine (CM)	Never a therapeutic interruption	No problem	No problem	No problems	Absence of pain/discomfort	Neither anxious nor depressed
202	CCD	No	31-60	Female	Government empl/retired	Bamako	Arabic / Local language	Salary above the SMIG	1-5 years	<30	High	Within normal limits or high	High	High	Low or optimal	High	Moderate	Paresthesia	Normal (clean without a skin lesion)	Dyslipidemia	No treatment	CM and Phytotherapy	Associated medicine	Interrupted for financial reasons	No problem	No problem	Problems	Moderate pain/discomfort	Moderately anxious or depressed
203	CCD	Yes	>60	Female	Government empl/retired	Bamako	Primary or secondary	Salary below the SMIG	5-10 years	≥30	High	Within normal limits or high	High	High	High	High	Very intense	Paresthesia	Abnormal (dirty with visible skin lesions)	Obesity + Dyslipidemia	Under treatment	CM and Phytotherapy	Associated medicine	Interrupted for financial reasons	Some problems	Problems with autonomy	Problems	Extreme pain/discomfort	Moderately anxious or depressed
204	GT-UHC	Yes	31-60	Male	Housewive	Bamako	Illiterate	No fixed salary or self-employed	< 1 year	<30	Low or optimal	Optimal	Low or optimal	Low or optimal	Low or optimal	Low or optimal	Low	Burning sensation	Normal (clean without a skin lesion)	Obesity	Under treatment	Conventional medicine (CM)	Conventional medicine (CM)	Never a therapeutic interruption	No problem	No problem	No problems	Absence of pain/discomfort	Neither anxious nor depressed
205	CCD	Yes	>60	Female	Blue collar job/merchants	Bamako	Primary or secondary	Salary below the SMIG	5-10 years	≥30	High	Within normal limits or high	High	High	High	High	Very intense	Searing pain	Abnormal (dirty with visible skin lesions)	Obesity + Dyslipidemia	Under treatment	CM and Phytotherapy	Associated medicine	Interrupted for financial reasons	Some problems	Problems with autonomy	Incapable	Extreme pain/discomfort	Moderately anxious or depressed
206	CCD	Yes	31-60	Female	Government empl/retired	Bamako	Primary or secondary	No fixed salary or self-employed	5-10 years	≥30	High	Within normal limits or high	High	High	High	High	Intense	Paresthesia	Abnormal (dirty with visible skin lesions)	Obesity + Dyslipidemia	No treatment	CM and Phytotherapy	Associated medicine	Interrupted for financial reasons	Some problems	Problems with autonomy	Problems	Extreme pain/discomfort	Moderately anxious or depressed
207	GT-UHC	No	16-30	Male	Housewive	Bamako	Illiterate	Salary below the SMIG	< 1 year	<30	Low or optimal	Optimal	Low or optimal	High	Low or optimal	Low or optimal	Low	Paresthesia	Normal (clean without a skin lesion)	Obesity	Under treatment	CM and Phytotherapy	Associated medicine	Never a therapeutic interruption	No problem	No problem	No problems	Absence of pain/discomfort	Neither anxious nor depressed
208	GT-UHC	Yes	31-60	Female	Government empl/retired	Bamako	Arabic / Local language	No fixed salary or self-employed	5-10 years	≥30	Low or optimal	Within normal limits or high	Low or optimal	Low or optimal	High	Low or optimal	Intense	Tingling	Abnormal (dirty with visible skin lesions)	Dyslipidemia	Under treatment	CM and Phytotherapy	Associated medicine	Interrupted for financial reasons	Some problems	Problems with autonomy	Problems	Moderate pain/discomfort	Neither anxious nor depressed
209	GT-UHC	Yes	31-60	Male	Housewive	Bamako	Illiterate	No fixed salary or self-employed	1-5 years	<30	Low or optimal	Optimal	Low or optimal	Low or optimal	Low or optimal	Low or optimal	Low	Burning sensation	Normal (clean without a skin lesion)	Obesity	Under treatment	Conventional medicine (CM)	Conventional medicine (CM)	Never a therapeutic interruption	No problem	No problem	No problems	Absence of pain/discomfort	Neither anxious nor depressed
210	GT-UHC	Yes	31-60	Female	Housewive	Bamako	Arabic / Local language	No fixed salary or self-employed	1-5 years	<30	Low or optimal	Within normal limits or high	Low or optimal	Low or optimal	Low or optimal	Low or optimal	Intense	Tingling	Normal (clean without a skin lesion)	Dyslipidemia	Under treatment	CM and Phytotherapy	Associated medicine	Never a therapeutic interruption	Some problems	Problems with autonomy	Problems	Moderate pain/discomfort	Neither anxious nor depressed
211	GT-UHC	No	16-30	Male	Housewive	Bamako	Illiterate	Salary below the SMIG	< 1 year	<30	Low or optimal	Optimal	Low or optimal	Low or optimal	Low or optimal	Low or optimal	Low	Burning sensation	Normal (clean without a skin lesion)	Obesity	Under treatment	Conventional medicine (CM)	Conventional medicine (CM)	Never a therapeutic interruption	No problem	No problem	No problems	Absence of pain/discomfort	Neither anxious nor depressed
212	CCD	Yes	>60	Female	Others	Outside of Bamako	Tertiary	Salary above the SMIG	>10 years	≥30	High	Within normal limits or high	High	High	High	High	Very intense	Numbness	Abnormal (dirty with visible skin lesions)	Obesity + AHT+ Dyslipidemia + Tobacco	Under treatment	CM and Scarification of the feet	Associated medicine	Interrupted for a traditional treatment	Restricted, bedridden	Incapable of grooming, getting dressed	Incapable	Extreme pain/discomfort	Extremely anxious or depressed
213	CCD	No	16-30	Female	Government empl/retired	Bamako	Arabic / Local language	Salary above the SMIG	1-5 years	<30	Low or optimal	Optimal	High	High	Low or optimal	Low or optimal	Moderate	Paresthesia	Normal (clean without a skin lesion)	AHT	No treatment	CM and Phytotherapy	Associated medicine	Interrupted for financial reasons	No problem	No problem	No problems	Moderate pain/discomfort	Moderately anxious or depressed
214	GT-UHC	Yes	31-60	Female	Housewive	Bamako	Illiterate	No fixed salary or self-employed	1-5 years	<30	Low or optimal	Within normal limits or high	Low or optimal	Low or optimal	Low or optimal	Low or optimal	Intense	Burning sensation	Normal (clean without a skin lesion)	AHT	Under treatment	CM and Phytotherapy	Associated medicine	Never a therapeutic interruption	No problem	No problem	Problems	Moderate pain/discomfort	Neither anxious nor depressed
215	CCD	No	16-30	Female	Housewive	Bamako	Illiterate	Salary above the SMIG	< 1 year	<30	Low or optimal	Optimal	Low or optimal	High	Low or optimal	Low or optimal	Low	Paresthesia	Normal (clean without a skin lesion)	AHT	No treatment	CM and Phytotherapy	Associated medicine	Never a therapeutic interruption	No problem	No problem	No problems	Absence of pain/discomfort	Neither anxious nor depressed
216	CCD	Yes	>60	Female	Blue collar job/merchants	Outside of Bamako	Primary or secondary	Salary above the SMIG	>10 years	≥30	High	Within normal limits or high	High	High	High	High	Very intense	Searing pain	Abnormal (dirty with visible skin lesions)	Obesity + Dyslipidemia	Under treatment	CM and Marabout	Associated medicine	Interrupted for financial reasons	Restricted, bedridden	Incapable of grooming, getting dressed	Incapable	Extreme pain/discomfort	Extremely anxious or depressed
217	GT-UHC	Yes	31-60	Female	Government empl/retired	Bamako	Arabic / Local language	No fixed salary or self-employed	5-10 years	≥30	High	Within normal limits or high	High	Low or optimal	High	High	Intense	Tingling	Abnormal (dirty with visible skin lesions)	Obesity + Dyslipidemia	Under treatment	CM and Phytotherapy	Associated medicine	Interrupted for financial reasons	Some problems	Problems with autonomy	Problems	Moderate pain/discomfort	Neither anxious nor depressed
218	GT-UHC	Yes	31-60	Female	Housewive	Bamako	Arabic / Local language	No fixed salary or self-employed	5-10 years	<30	Low or optimal	Within normal limits or high	Low or optimal	Low or optimal	High	Low or optimal	Intense	Tingling	Normal (clean without a skin lesion)	Dyslipidemia	Under treatment	CM and Phytotherapy	Associated medicine	Never a therapeutic interruption	Some problems	Problems with autonomy	Problems	Moderate pain/discomfort	Neither anxious nor depressed
219	GT-UHC	Yes	31-60	Female	Government empl/retired	Bamako	Arabic / Local language	No fixed salary or self-employed	5-10 years	≥30	High	Within normal limits or high	High	Low or optimal	High	Low or optimal	Intense	Tingling	Abnormal (dirty with visible skin lesions)	Tobacco	Under treatment	CM and Phytotherapy	Associated medicine	Interrupted for financial reasons	Some problems	Problems with autonomy	Problems	Moderate pain/discomfort	Neither anxious nor depressed
220	CCD	Yes	>60	Female	Blue collar job/merchants	Bamako	Primary or secondary	Salary above the SMIG	5-10 years	≥30	High	Within normal limits or high	High	High	High	High	Very intense	Searing pain	Abnormal (dirty with visible skin lesions)	Obesity + Dyslipidemia	Under treatment	CM and Marabout	Associated medicine	Interrupted for financial reasons	Some problems	Problems with autonomy	Incapable	Extreme pain/discomfort	Moderately anxious or depressed
221	GT-UHC	Yes	31-60	Male	Housewive	Bamako	Illiterate	No fixed salary or self-employed	< 1 year	<30	Low or optimal	Optimal	Low or optimal	Low or optimal	Low or optimal	Low or optimal	Low	Burning sensation	Normal (clean without a skin lesion)	Obesity	Under treatment	Conventional medicine (CM)	Conventional medicine (CM)	Never a therapeutic interruption	No problem	No problem	No problems	Absence of pain/discomfort	Neither anxious nor depressed
222	GT-UHC	Yes	31-60	Female	Government empl/retired	Bamako	Arabic / Local language	No fixed salary or self-employed	5-10 years	≥30	High	Within normal limits or high	High	Low or optimal	High	High	Intense	Tingling	Abnormal (dirty with visible skin lesions)	Obesity + AHT	Under treatment	CM and Phytotherapy	Associated medicine	Interrupted for financial reasons	Some problems	Problems with autonomy	Problems	Moderate pain/discomfort	Neither anxious nor depressed
223	CCD	Yes	31-60	Female	Government empl/retired	Bamako	Primary or secondary	No fixed salary or self-employed	5-10 years	≥30	High	Within normal limits or high	High	High	High	High	Intense	Paresthesia	Abnormal (dirty with visible skin lesions)	Obesity + Dyslipidemia	No treatment	CM and Phytotherapy	Associated medicine	Interrupted for financial reasons	Some problems	Problems with autonomy	Problems	Moderate pain/discomfort	Moderately anxious or depressed
224	GT-UHC	Yes	31-60	Female	Government empl/retired	Bamako	Arabic / Local language	No fixed salary or self-employed	5-10 years	≥30	High	Within normal limits or high	High	Low or optimal	High	Low or optimal	Intense	Tingling	Abnormal (dirty with visible skin lesions)	Obesity + AHT	Under treatment	CM and Phytotherapy	Associated medicine	Interrupted for financial reasons	Some problems	Problems with autonomy	Problems	Moderate pain/discomfort	Neither anxious nor depressed
225	GT-UHC	Yes	31-60	Female	Government empl/retired	Bamako	Arabic / Local language	No fixed salary or self-employed	5-10 years	≥30	High	Within normal limits or high	High	Low or optimal	High	Low or optimal	Intense	Tingling	Abnormal (dirty with visible skin lesions)	Obesity + AHT	Under treatment	CM and Phytotherapy	Associated medicine	Interrupted for financial reasons	Some problems	Problems with autonomy	Problems	Moderate pain/discomfort	Neither anxious nor depressed
226	CCD	Yes	>60	Female	Blue collar job/merchants	Bamako	Primary or secondary	Salary below the SMIG	5-10 years	≥30	High	Within normal limits or high	High	High	High	High	Very intense	Searing pain	Abnormal (dirty with visible skin lesions)	Obesity + Dyslipidemia	Under treatment	CM and Phytotherapy	Associated medicine	Interrupted for financial reasons	Some problems	Problems with autonomy	Incapable	Extreme pain/discomfort	Moderately anxious or depressed
227	CCD	Yes	>60	Female	Blue collar job/merchants	Outside of Bamako	Primary or secondary	Salary above the SMIG	>10 years	≥30	High	Within normal limits or high	High	High	High	High	Very intense	Searing pain	Abnormal (dirty with visible skin lesions)	Obesity + Tobacco	Under treatment	CM and Marabout	Associated medicine	Interrupted for financial reasons	Restricted, bedridden	Incapable of grooming, getting dressed	Incapable	Extreme pain/discomfort	Extremely anxious or depressed
228	CCD	Yes	31-60	Female	Government empl/retired	Bamako	Primary or secondary	No fixed salary or self-employed	5-10 years	≥30	High	Within normal limits or high	High	High	High	High	Very intense	Paresthesia	Abnormal (dirty with visible skin lesions)	Obesity + Dyslipidemia	Under treatment	CM and Phytotherapy	Associated medicine	Interrupted for financial reasons	Some problems	Problems with autonomy	Problems	Extreme pain/discomfort	Moderately anxious or depressed
229	GT-UHC	Yes	31-60	Male	Housewive	Bamako	Illiterate	No fixed salary or self-employed	1-5 years	<30	Low or optimal	Within normal limits or high	Low or optimal	Low or optimal	Low or optimal	Low or optimal	Moderate	Burning sensation	Normal (clean without a skin lesion)	Obesity	Under treatment	CM and Phytotherapy	Associated medicine	Never a therapeutic interruption	No problem	No problem	Problems	Absence of pain/discomfort	Neither anxious nor depressed
230	CCD	Yes	>60	Female	Blue collar job/merchants	Bamako	Primary or secondary	Salary below the SMIG	5-10 years	≥30	High	Within normal limits or high	High	High	High	High	Very intense	Searing pain	Abnormal (dirty with visible skin lesions)	Obesity + Dyslipidemia	Under treatment	CM and Phytotherapy	Associated medicine	Interrupted for financial reasons	Some problems	Problems with autonomy	Incapable	Extreme pain/discomfort	Moderately anxious or depressed
231	CCD	Yes	>60	Female	Blue collar job/merchants	Bamako	Primary or secondary	Salary above the SMIG	5-10 years	≥30	High	Within normal limits or high	High	High	High	High	Very intense	Searing pain	Abnormal (dirty with visible skin lesions)	Obesity + Dyslipidemia	Under treatment	CM and Marabout	Associated medicine	Interrupted for financial reasons	Some problems	Problems with autonomy	Incapable	Extreme pain/discomfort	Moderately anxious or depressed
232	CCD	Yes	>60	Female	Blue collar job/merchants	Outside of Bamako	Primary or secondary	Salary above the SMIG	>10 years	≥30	High	Within normal limits or high	High	High	High	High	Very intense	Numbness	Abnormal (dirty with visible skin lesions)	AHT + dyslipidemia	Under treatment	CM and Marabout	Associated medicine	Interrupted due to unavailability	Restricted, bedridden	Incapable of grooming, getting dressed	Incapable	Extreme pain/discomfort	Extremely anxious or depressed
233	GT-UHC	Yes	31-60	Female	Housewive	Bamako	Arabic / Local language	No fixed salary or self-employed	5-10 years	<30	Low or optimal	Within normal limits or high	Low or optimal	Low or optimal	Low or optimal	Low or optimal	Intense	Tingling	Normal (clean without a skin lesion)	Dyslipidemia	Under treatment	CM and Phytotherapy	Associated medicine	Never a therapeutic interruption	Some problems	Problems with autonomy	Problems	Moderate pain/discomfort	Neither anxious nor depressed
234	GT-UHC	No	16-30	Male	Housewive	Bamako	Illiterate	Salary below the SMIG	< 1 year	<30	Low or optimal	Optimal	Low or optimal	Low or optimal	Low or optimal	Low or optimal	Low	Tingling	Normal (clean without a skin lesion)	Obesity	Under treatment	CM and Phytotherapy	Associated medicine	Never a therapeutic interruption	No problem	No problem	No problems	Absence of pain/discomfort	Neither anxious nor depressed
235	CCD	No	31-60	Female	Blue collar job/merchants	Bamako	Arabic / Local language	Salary above the SMIG	1-5 years	<30	High	Within normal limits or high	High	High	High	High	Moderate	Paresthesia	Normal (clean without a skin lesion)	Dyslipidemia	No treatment	CM and Phytotherapy	Associated medicine	Interrupted for financial reasons	No problem	No problem	Problems	Moderate pain/discomfort	Moderately anxious or depressed
236	CCD	Yes	>60	Female	Blue collar job/merchants	Bamako	Primary or secondary	Salary below the SMIG	5-10 years	≥30	High	Within normal limits or high	High	High	High	High	Very intense	Paresthesia	Abnormal (dirty with visible skin lesions)	Obesity + Dyslipidemia	Under treatment	CM and Phytotherapy	Associated medicine	Interrupted for financial reasons	Some problems	Problems with autonomy	Incapable	Extreme pain/discomfort	Moderately anxious or depressed
237	CCD	No	31-60	Female	Others	Outside of Bamako	Tertiary	Salary above the SMIG	>10 years	≥30	High	Within normal limits or high	High	High	High	High	Very intense	Searing pain	Abnormal (dirty with visible skin lesions)	AHT + dyslipidemia	Under treatment	CM and Marabout	Associated medicine	Interrupted for a traditional treatment	Some problems	Missing	Problems	Extreme pain/discomfort	Extremely anxious or depressed
238	GT-UHC	No	16-30	Male	Housewive	Bamako	Illiterate	No fixed salary or self-employed	< 1 year	<30	Low or optimal	Optimal	Low or optimal	Low or optimal	Low or optimal	Low or optimal	Low	Burning sensation	Normal (clean without a skin lesion)	Obesity	Under treatment	Conventional medicine (CM)	Conventional medicine (CM)	Never a therapeutic interruption	No problem	No problem	No problems	Absence of pain/discomfort	Neither anxious nor depressed
239	GT-UHC	Yes	31-60	Male	Housewive	Bamako	Illiterate	No fixed salary or self-employed	1-5 years	<30	Low or optimal	Optimal	Low or optimal	Low or optimal	Low or optimal	Low or optimal	Low	Burning sensation	Normal (clean without a skin lesion)	Obesity	Under treatment	Conventional medicine (CM)	Conventional medicine (CM)	Never a therapeutic interruption	No problem	No problem	No problems	Absence of pain/discomfort	Neither anxious nor depressed
240	GT-UHC	Yes	31-60	Male	Housewive	Bamako	Illiterate	No fixed salary or self-employed	1-5 years	<30	Low or optimal	Optimal	Low or optimal	Low or optimal	Low or optimal	Low or optimal	Low	Burning sensation	Normal (clean without a skin lesion)	Obesity	Under treatment	Conventional medicine (CM)	Conventional medicine (CM)	Never a therapeutic interruption	No problem	No problem	No problems	Absence of pain/discomfort	Neither anxious nor depressed
241	GT-UHC	Yes	31-60	Male	Housewive	Bamako	Illiterate	No fixed salary or self-employed	1-5 years	<30	Low or optimal	Within normal limits or high	Low or optimal	Low or optimal	Low or optimal	Low or optimal	Moderate	Burning sensation	Normal (clean without a skin lesion)	Obesity	Under treatment	CM and Phytotherapy	Associated medicine	Never a therapeutic interruption	No problem	No problem	Problems	Absence of pain/discomfort	Neither anxious nor depressed
242	CCD	Yes	31-60	Female	Government empl/retired	Bamako	Primary or secondary	Salary below the SMIG	5-10 years	≥30	High	Within normal limits or high	High	High	High	High	Very intense	Paresthesia	Abnormal (dirty with visible skin lesions)	Obesity + Dyslipidemia	Under treatment	CM and Phytotherapy	Associated medicine	Interrupted for financial reasons	Some problems	Problems with autonomy	Problems	Extreme pain/discomfort	Moderately anxious or depressed
243	CCD	No	16-30	Female	Government empl/retired	Bamako	Arabic / Local language	Salary above the SMIG	1-5 years	<30	Low or optimal	Optimal	High	High	Low or optimal	Low or optimal	Moderate	Paresthesia	Normal (clean without a skin lesion)	AHT	No treatment	CM and Phytotherapy	Associated medicine	Interrupted for financial reasons	No problem	No problem	No problems	Moderate pain/discomfort	Moderately anxious or depressed
244	CCD	No	31-60	Female	Government empl/retired	Bamako	Arabic / Local language	Salary above the SMIG	1-5 years	<30	High	Within normal limits or high	High	High	High	High	Moderate	Paresthesia	Normal (clean without a skin lesion)	Dyslipidemia	No treatment	CM and Phytotherapy	Associated medicine	Interrupted for financial reasons	No problem	No problem	Problems	Moderate pain/discomfort	Moderately anxious or depressed
245	GT-UHC	Yes	31-60	Male	Housewive	Bamako	Illiterate	No fixed salary or self-employed	1-5 years	<30	Low or optimal	Within normal limits or high	Low or optimal	Low or optimal	Low or optimal	Low or optimal	Moderate	Burning sensation	Normal (clean without a skin lesion)	Obesity	Under treatment	CM and Phytotherapy	Associated medicine	Never a therapeutic interruption	No problem	No problem	Problems	Absence of pain/discomfort	Neither anxious nor depressed
246	CCD	No	16-30	Female	Government empl/retired	Bamako	Arabic / Local language	Salary above the SMIG	1-5 years	<30	Low or optimal	Optimal	High	High	Low or optimal	Low or optimal	Moderate	Paresthesia	Normal (clean without a skin lesion)	Dyslipidemia	No treatment	CM and Phytotherapy	Associated medicine	Interrupted for financial reasons	No problem	No problem	No problems	Moderate pain/discomfort	Moderately anxious or depressed
247	GT-UHC	Yes	31-60	Female	Housewive	Bamako	Illiterate	No fixed salary or self-employed	1-5 years	<30	Low or optimal	Within normal limits or high	Low or optimal	Low or optimal	Low or optimal	Low or optimal	Intense	Burning sensation	Normal (clean without a skin lesion)	AHT	Under treatment	CM and Phytotherapy	Associated medicine	Never a therapeutic interruption	No problem	No problem	Problems	Moderate pain/discomfort	Neither anxious nor depressed
248	CCD	Yes	>60	Female	Blue collar job/merchants	Bamako	Primary or secondary	Salary above the SMIG	5-10 years	≥30	High	Within normal limits or high	High	High	High	High	Very intense	Searing pain	Abnormal (dirty with visible skin lesions)	Obesity + Dyslipidemia	Under treatment	CM and Marabout	Associated medicine	Interrupted for financial reasons	Some problems	Problems with autonomy	Incapable	Extreme pain/discomfort	Moderately anxious or depressed
249	GT-UHC	Yes	31-60	Male	Housewive	Bamako	Illiterate	No fixed salary or self-employed	1-5 years	<30	Low or optimal	Optimal	Low or optimal	Low or optimal	Low or optimal	Low or optimal	Low	Burning sensation	Normal (clean without a skin lesion)	Obesity	Under treatment	Conventional medicine (CM)	Conventional medicine (CM)	Never a therapeutic interruption	No problem	No problem	No problems	Absence of pain/discomfort	Neither anxious nor depressed
250	GT-UHC	Yes	31-60	Male	Housewive	Bamako	Illiterate	No fixed salary or self-employed	1-5 years	<30	Low or optimal	Within normal limits or high	Low or optimal	Low or optimal	Low or optimal	Low or optimal	Moderate	Burning sensation	Normal (clean without a skin lesion)	Obesity	Under treatment	CM and Phytotherapy	Associated medicine	Never a therapeutic interruption	No problem	No problem	Problems	Absence of pain/discomfort	Neither anxious nor depressed
251	CCD	Yes	>60	Female	Blue collar job/merchants	Bamako	Primary or secondary	Salary below the SMIG	5-10 years	≥30	High	Within normal limits or high	High	High	High	High	Very intense	Paresthesia	Abnormal (dirty with visible skin lesions)	Obesity + Dyslipidemia	Under treatment	CM and Phytotherapy	Associated medicine	Interrupted for financial reasons	Some problems	Problems with autonomy	Incapable	Extreme pain/discomfort	Moderately anxious or depressed
252	GT-UHC	Yes	31-60	Female	Government empl/retired	Bamako	Arabic / Local language	No fixed salary or self-employed	5-10 years	≥30	High	Within normal limits or high	High	Low or optimal	High	Low or optimal	Intense	Tingling	Abnormal (dirty with visible skin lesions)	Obesity + AHT	Under treatment	CM and Phytotherapy	Associated medicine	Interrupted for financial reasons	Some problems	Problems with autonomy	Problems	Moderate pain/discomfort	Neither anxious nor depressed

## Sheet: Code_book
Code	Definition
Socio_prof	Socio-professional ranking
Government empl/retired	Government employees and Retired officials
Blue collar job/merchants	Blue collar job, merchants, farmers and informal workers
Education	Education level
Arabic / Local language	Literate in Arabic or in the Local language
Income_SMIG	Income relative to the SMIG
Evol_diabetes	Evolution of the diabetes
<30	<30 (obesity absent)
≥30	≥30 (Obesity present)
BP	Blood Pressure
TCholesterol	Total cholesterol
Intens_pain	Intensity of the pain
Type_pain	Type of pain
Foot_exam	Foot examination
Asso_factors	Associated factors
Neuro_treat	Status of the neuropathic pain treatment
Type_treat	Type of treatment in general
Thera_observ	General therapeutic observance
Usual_activi	Usual activities
Pain_discomf	Pain/discomfort
Anxiety_Dep	Anxiety/Depression
